# Supplementary material
Source: publisher figshare collection journal article supplement (https://frontiersin.figshare.com/ndownloader/files/13203326)
Supplement: Supplementary file 1 [file 13203326]

## Sheet: SM1-sheet1-variant-abundances-1percent
Dominant variants (>10 % of the reads in at least one sample)			Percentages (>10 % in bold)
	Variant number	Sequence	Alvinocaris – A1lat	Alvinocaris – A1med	R. chacei - A1lat	R. chacei – A1med	R. chacei – A2	Mirocaris – A1lat	Mirocaris – A1med	Mirocaris – A2	Palaemon – A1lat	Palaemon – A1med	Palaemon – A2	R. exoculata - A1lat	R. exoculata – A1med	R. exoculata – A2	Maximum percentage
5fa9cd2e5ab13715cddce17de2e9928f	1	TTGATCCTGGCTCAGAGTGAACGCTGGCGGCGTGCTTAACACATGCAAGTCGAACGAGAACGGTCCTAGCTTGCTAGGATGTCAGCTAAGTGGCGGACGGGTGAGTAATGTATAGTTAATCTGCCCTTTAGAGGGGGATAACTACTGGAAACGGTAGCTAATACCCCATACTCCTTTTACCTTAATGGTAATTGGGAAATGTTTTTTCGCTAAAGGATGAGACTATATGGTATCAGGTAGTTGGTGGGGTAAGAGCCTACCAAGCCAATGACGCCTAGCTGGTCTGAGAGGATGATCAGCCACACTGGAACTGAGACACGGTCCAGACTCCTACGGGAGGCAGCAGTGGGGAATATTGCACAATGGGGGAAACCCTGATGCAGCAACGCCGCGTGGAGG…	0.135633	0.148869	0.0819255	0.0871997	0.0140288	1.6005	1.41296	3.4728	0.0155286	0	0.00582025	16.2094	17.4585	25.3443	25.3443
ce6f21c8cc56d51582ea17b8b75d252e	2	TTGATCCTGGCTCAGAGTGAACGCTGGCGGCGTGCTTAACACATGCAAGTCGAACGAGAACGGTACTAGCTTGCTAGTATGTCAGCTAAGTGGCGGACGGGTGAGTAATGTATAGTTAATCTGCCCTTTAGAGGGGGATAACTACTGGAAACGGTAGCTAATACCCCATACTCCTTTTACCTTAATGGTAATTGGGAAATGTTTTTTCGCTAAAGGATGAGACTATATGGTATCAGGTAGTTGGTGGGGTAATAGCCTACCAAGCCAATGACGCCTAGCTGGTCTGAGAGGATGATCAGCCACACTGGAACTGAGACACGGTCCAGACTCCTACGGGAGGCAGCAGTGGGGAATATTGCACAATGGGGGAAACCCTGATGCAGCAACGCCGCGTGGAGG…	0.118565	0.0185809	0	0	0	0	0	0	0	0	0	19.8982	18.5353	11.4686	19.8982
0ea707d8047463e62e01a1153f739e57	3	TTGATCCTGGCTCAGAGTGAACGCTGGCGGCGTGCTTAACACATGCAAGTCGAACGAGAACGGTACTAGCTTGCTAGTATGTCAGCTAAGTGGCGGACGGGTGAGTAATGTATAGTTAATCTGCCCTTCAGAGGGGGATAACTACTGGAAACGGTAGCTAATACCCCATATACCTTCTAGTGTAATGCTAGATGGGAAATGTCTTTTCGCTGAAGGATGAGACTATATGGTATCAGGTAGTTGGTGGGGTAAGAGCCCACCAAGCCTATGACGCCTAGCTGGTCTGAGAGGATGATCAGCCACACTGGAACTGAGACACGGTCCAGACTCCTACGGGAGGCAGCAGTGGGGAATATTGCACAATGGAGGAAACTCTGATGCAGCAACGCCGCGTGGAGG…	35.5177	39.0264	0	0	0	0	0	0	0	0	0	0	0	0	39.0264
3fdec649d9c8412b2cf598906047ce8b	4	TTGATCCTGGCTCAGAGTGAACGCTGGCGGCGTGCTTAACACATGCAAGTCGAACGAGAACGGTCCTAGCTTGCTAGGATGTCAGCTAAGTGGCGGACGGGTGAGTAATGTATAGTTAATCTGCCCTTTAGAGGGGGATAACTACTGGAAACGGTAGCTAATACCCCATACTCCTTTTGCCTTAATGGTAACTGGGAAATGTTTTTTCGCTAAAGGATGAGACTATATGGTATCAGGTAGTTGGTGGGGTAAGAGCCTACCAAGCCAATGACGCCTAGCTGGTCTGAGAGGATGATCAGCCACACTGGAACTGAGACACGGTCCAGACTCCTACGGGAGGCAGCAGTGGGGAATATTGCACAATGGGGGAAACCCTGATGCAGCAACGCCGCGTGGAGG…	0.034905	0.0323364	0	0	0	0	0	0	0	0	0	20.1125	16.6978	12.1424	20.1125
eb40aa9bdc55ac2698f6606407ff7a50	5	TTGATCCTGGCTCAGAGTGAACGCTGGCGGCGTGCTTAACACATGCAAGTCGAACGGTAACAGAAGTAGCTTGCTACTTGCTGACGAGTGGCGAACGGGTGAGTAAAGTATAGTTAATTTGCCTTTAGGATAGGGATAGCCATTGGAAACGATGATTAATACCTAATATACCTTGCTTAGTAAATAAGTAAGGGAAATGCTTTTGTGCCTAAAGATAAGACTATATGGTATCAGGTAGTTGGTGGGGTAAGAGCCTACCAAGCCAATGACGCCTAGCTGGTCTGAGAGGATGATCAGCCACACTGGAACTGAGACACGGTCCAGACTCCTACGGGAGGCAGCAGTGGGGAATATTGCACAATGGAGGGAACTCTGATGCAGCAACGCCGCGTGGAGGAT…	0	0.00843076	0	0	0	12.9346	13.8634	14.9088	0	0.017375	0.00189966	0	0	0	14.9088
597d4e2ba99ad1d400b9fb2f8be57c59	6	TTGATCCTGGCTCAGAGTGAACGCTGGCGGCGTGCTTAACACATGCAAGTCGAACGAGAACGGTACTAGCTTGCTAGTATGTCAGCTAAGTGGCGGACGGGTGAGTAATGTATAGTTAATCTGCCCTTTAGAGGGGGATAACAGTTAGAAATGACTGCTAATACCCCATACTCCTTTTATTTTAATAATAATTGGGAAATGTTTTTTCGCTAAAGGATGAGACTATATGGTATCAGGTAGTTGGTGGGGTAAGAGCCTACCAAGCCAATGACGCCTAGCTGGTCTGAGAGGATGATCAGCCACACTGGAACTGAGACACGGTCCAGACTCCTACGGGAGGCAGCAGTGGGGAATATTGCACAATGGGGGAAACCCTGATGCAGCAACGCCGCGTGGAGG…	0.0976502	0.0865817	0	0	0	19.3452	5.39608	14.2824	0.00770413	0.00655465	0.0019805	0.701092	0.144628	0.100674	19.3452
78d3c100debf219fc03445861bbeec6a	7	TTGATCCTGGCTCAGAGTGAACGCTGGCGGCGTGCTTAACACATGCAAGTCGAACGGTAGCAGCAGTGCTTGCACTGGCTGACGAGTGGCGAACGGGTGAGTAATGTATAGTTAATTTGCCTTTAGGATAGGGATAGCCATTGGAAACGATGATTAATACCTAATATACCTTTTATTGTAGTGATAAAAGGGAAATGCTTTTGTGCCTAAAGATAAGACTATATGGTATCAGGTAGTTGGTGGGGTAAGAGCCTACCAAGCCGATGACGCCTAGCTGGTCTGAGAGGATGATCAGCCACACTGGAACTGAGACACGGTCCAGACTCCTACGGGAGGCAGCAGTGGGGAATATTGCACAATGGAGGAAACTCTGATGCAGCAACGCCGCGTGGAGGATGA…	0	0	16.7462	13.7923	12.0117	0	0	0	0	0	0	0.00362134	0	0	16.7462
7772995e18aec26399acf503bfb28489	8	TTGATCCTGGCTCAGAGTGAACGCTGGCGGCGTGCTTAACACATGCAAGTCGAACGGTAACAGCAGTGCTTGCACTGGCTGACGAGTGGCGAACGGGTGAGTAAAGTATAGTTAATTTGCCTTTAGGATAGGGATAGCCATTGGAAACGATGATTAATACCTAATATACCTTGCTTAGTAAATAAGTAAGGGAAATGCTTTTGTGCCTAAAGATAAGACTATATGGTATCAGGTAGTTGGTGGGGTAAGAGCCTACCAAGCCAATGACGCCTAGCTGGTCTGAGAGGATGATCAGCCACACTGGAACTGAGACACGGTCCAGACTCCTACGGGAGGCAGCAGTGGGGAATATTGCACAATGGAGGGAACTCTGATGCAGCAACGCCGCGTGGAGGATGA…	0	0.00870809	0	0	0	9.1421	7.71089	10.3643	0	0.0106123	0	0	0	0	10.3643
59317dd2bd7c38da03cfde6cf85e7b8f	9	TTGATCCTGGCTCAGATTGAACGCTGGCGGCATGCTTAACACATGCAAGTCGAACGGAAACGCGAAGAGCTTGCTCTTTGGCGTCGAGTGGCGGACGGGTGAGTAACGCGTGGGAATCTACCCAGTAGTGGAGGATAGCCCAGAGAAATTTGGATTAATACTGCATGTGATCTACGGATGAAAGGTGGCCTCTCCTTGGAAGCTATCGCTATTGGATGAGCCCGCGTTAGATTAGCTAGTTGGTGGGGTAAGAGCCTACCAAGGCGACGATCTATAGCTGGTCTGAGAGGACGACCAGCCACATCGGGACTGAGACACGGCCCGGACTCCTACGGGAGGCAGCAGTGGGGAATATTGGACAATGGGCGCAAGCCTGATCCAGCAATGCCGCGTGTGTGA…	20.1264	11.8257	0	0	0	0	0	0	0	0	0	0	0	0	20.1264
c11419fb7d01ac895901f84ae074d2c1	10	TTGATCCTGGCTCAGATTGAACGCTGGCGGTATGCTTAACACATGCAAGTCGAACGGAAACGATAAGAGCTTGCTCTTAGGCGTCGAGTGGCGGACGGGTGAGTAACGCGTAGGAATCTGCCTGATAGTGGGGGATAGCCCAGAGAAATCTGGATTAATACCGCATAATCTCTATGGAGTAAAGTGGAGGACCTTCGGGCTTCACGCTATCAGATGAGCCTGCGTAAGATTAGCTTGTTGGTGAGGTAAAAGCTCACCAAGGCGACGATCTTTAGCTGGTCTGAGAGGATGATCAGCCACACTGGAACTGAGACACGGTCCAGACTCCTACGGGAGGCAGCAGTGGGGAATATTGGACAATGGGGGCAACCCTGATCCAGCAATACCGCGTGTGTGAAG…	6.28668	10.6941	0	0	0	0	0	0	0	0	0	0	0	0.00111574	10.6941
Abundant variants (>1 % of the reads in at least one sample)			Percentages (>1 % in bold)
	Variant number	Sequence	Alvinocaris – A1lat	Alvinocaris – A1med	R. chacei - A1lat	R. chacei – A1med	R. chacei – A2	Mirocaris – A1lat	Mirocaris – A1med	Mirocaris – A2	Palaemon – A1lat	Palaemon – A1med	Palaemon – A2	R. exoculata - A1lat	R. exoculata – A1med	R. exoculata – A2	Maximum percentage
c8415c282633129deb96195f53c224d6	11	TTGATCCTGGCTCAGAGTGAACGCTGGCGGCGTGCTTAACACATGCAAGTCGAACGAGAACGGTCCTAGCTTGCTAGGATGTCAGCTAAGTGGCGGACGGGTGAGTAATGTATAGTTAATCTGCCCTTTAGAGGGGGATAACTACTGGAAACGGTAGCTAATACCCCATACTCCTTTTACCTTAATGGTAATTGGGAAATGTTTTTTCGCTAAAGGATGAGACTATATGGTATCAGGTAGTTGGTGGGGTAAGAGCCTACCAAGCCAATGACACCTAGCTGGTCTGAGAGGATGATCAGCCACACTGGAACTGAGACACGGTCCAGACTCCTACGGGAGGCAGCAGTGGGGAATATTGCACAATGGGGGAAACCCTGATGCAGCAACGCCGCGTGGAGG…	0.719995	0.616998	0.0808813	0.0685276	0.109773	4.87616	3.02337	1.4213	0	0.00291318	0	4.22679	2.96327	9.15291	9.15291
61ecea0993404a7ea241b745e77204f2	12	TTGATCCTGGCTCAGATTGAACGCTGGCGGCATGCTTAACACATGCAAGTCGAACGGAAACGCGAAGAGCTTGCTCTTTGGCGTCGAGTGGCGGACGGGTGAGTAACGCGTGGGAATCTACTCAGTAGTGGGGGATAGCCAGGAGAAATTCTGATTAATACCGCATACGATCTACGGATGAAAGGTGGCCTCTACATGTAAGCTATCGCTATTGAATGAGCCCGCGTTAGATTAGCTAGTTGGTAGGGTAAAGGCCTACCAAGGCGACGATCTATAGCTGGTCTGAGAGGACGACCAGCCACATCGGGACTGAGACACGGCCCGGACTCCTACGGGAGGCAGCAGTGGGGAATATTGGACAATGGGCGCAAGCCTGATCCAGCAATGCCGCGTGTGTGA…	0	0	5.87253	7.62206	9.61201	0	0	0	0	0	0	0.380422	0.5459	0.251341	9.61201
67e46bce0775dd70ae17b14ac0c2e624	13	TTGATCCTGGCTCAGAGTGAACGCTGGCGGCGTGCTTAACACATGCAAGTCGAACGAGAACGGTCCTAGCTTGCTAGGATGTCAGCTAAGTGGCGGACGGGTGAGTAATGTATAGTTAATCTGCCCTTTAGAGGGGGATAACTACTGGAAACGGTAGCTAATACCCCATACTCCTTTTGCCTTAATGGTAATTGGGAAATGTTTTTTCGCTAAAGGATGAGACTATATGGTATCAGGTAGTTGGTGGGGTAAGAGCCTACCAAGCCAATGACGCCTAGCTGGTCTGAGAGGATGATCAGCCACACTGGAACTGAGACACGGTCCAGACTCCTACGGGAGGCAGCAGTGGGGAATATTGCACAATGGGGGAAACCCTGATGCAGCAACGCCGCGTGGAGG…	0.039102	0.0366627	0	0	0	0	0	0	0	0	0	6.56998	7.0163	7.86646	7.86646
ba641300cbc0af702c2afd6af577fbbb	14	TTGATCCTGGCTCAGATTGAACGCTGGCGGCATGCTTAACACATGCAAGTCGAACGGAAACGCGAAGAGCTTGCTCTTTGGCGTCGAGTGGCGGACGGGTGAGTAACGCGTGGGAATCTACTCAGTAGTGGGGGATAGCCAGGAGAAATTCTGATTAATACCGCATACGATCTACGGATGAAAGGTGGCCTCTACATGTAAGCTATCGCTATTGAATGAGCCCGCGTTAGATTAGCTAGTTGGTAGGGTAAAGGCCTACCAAGGCGACGATCTATAGCTGGTCTGAGAGGACGACCAGCCACATCGGGACTGAGACACGGCCCGGACTCCTACGGGAGGCAGCAGTGGGGAATATTGGACAATGGGCGCAAGCCTGATCCAGCAATGCCGCGTGTGTGA…	0	0	5.69539	7.37942	8.66801	0	0	0	0	0	0	0	0	0	8.66801
36ada9ceedea993ea49242a919a9f385	15	TTGATCCTGGCTCAGAGTGAACGCTGGCGGCGTGCTTAACACATGCAAGTCGAACGGTAACAGCAGTGCTTGCACTGGCTGACGAGTGGCGAACGGGTGAGTAATGTATAGTTAATTTGCCTTTAGGATAGGGATAGCCATTGGAAACGATGATTAATACCTAATATACCTTTTATTGTAGTGATAAAAGGGAAATGCTTTTGTGCCTAAAGATAAGACTATATGGTATCAGGTAGTTGGTGGGGTAAGAGCCTACCAAGCCGATGACGCCTAGCTGGTCTGAGAGGATGATCAGCCACACTGGAACTGAGACACGGTCCAGACTCCTACGGGAGGCAGCAGTGGGGAATATTGCACAATGGAGGAAACTCTGATGCAGCAACGCCGCGTGGAGGATGA…	0	0	8.18904	6.86228	6.65006	0	0	0	0	0	0	0	0	0	8.18904
d297e3f53c96003a71fe4422c8b0d0a8	16	TTGATCCTGGCTCAGATTGAACGCTGGCGGCATGCTTAACACATGCAAGTCGAACGGTAACGATAGGTACTTGTACCTAGGCGACGAGTGGCGGACGGGTGAGTAACGCGTGGGAATCTACCCAGTAGTGGAGGATAGCCCAGAGAAATTTGGATTAATACTGCATGTGATCTACGGATGAAAGGTGGCCTCTCCTTGGAAGCTATCGCTATTGGATGAGCCCGCGTTAGATTAGCTAGTTGGTGGGGTAAGAGCCTACCAAGGCGACGATCTATAGCTGGTCTGAGAGGACGACCAGCCACATCGGGACTGAGACACGGCCCGGACTCCTACGGGAGGCAGCAGTGGGGAATATTGGACAATGGGCGCAAGCCTGATCCAGCAATGCCGCGTGTGTGA…	0.0582683	0.14532	7.6447	7.19075	6.36291	0.000823559	0.00206416	0.00116309	0	0	0	0.0216375	0.0397012	0.0151912	7.6447
bf651f40e8fffd39270e55cf42497091	17	TTGATCCTGGCTCAGATTGAACGCTGGCGGCATGCTTAACACATGCAAGTCGAACGGAAACGCGAAGAGCTTGCTCTTTGGCGTCGAGTGGCGGACGGGTGAGTAACGCGTGGGAATCTACTCAGTAGTGGGGGATAGCCAGGAGAAATCCTGATTAATACCGCATACGATCTACGGATGAAAGGTGGCCACTCCTTGGAAGCTATCGCTATTGAATGAGCCCGCGTTAGATTAGCTGGTTGGTGGGGTAAAGGCCTACCAAGGCGACGATCTATAGCTGGTCTGAGAGGACGACCAGCCACATCGGGACTGAGACACGGCCCGGACTCCTACGGGAGGCAGCAGTGGGGAATATTGGACAATGGGCGCAAGCCTGATCCAGCAATGCCGCGTGTGTGA…	0.0130806	0	0	0	0	3.3216	7.45417	4.92074	0	0.00754306	0	0	0	0	7.45417
ed215c85bf759192296e6508b78a4f64	18	TTGATCCTGGCTCAGAGTGAACGCTGGCGGCGTGCTTAACACATGCAAGTCGAACGGTAACAGCAGTACTTGTACTGGCTGACGAGTGGCGAACGGGTGAGTAATGTATAGTTGATTTGCCTTTAGGATAGGGATAGCCATTGGAAACGATGATTAATACCTAATATACCTTACTTAGTAAATAAGTAAGGGAAATGCTTTCGTGCCTAAAGATAAGACTATATGGTATCAGGTAGTTGGTGGGGTAAGAGCCTACCAAGCCGATGACGCCTAGCTGGTCTGAGAGGATGATCAGCCACACTGGAACTGAGACACGGTCCAGACTCCTACGGGAGGCAGCAGTGGGGAATATTGCACAATGGAGGAAACTCTGATGCAGCAACGCCGCGTGGAGGATGA…	0.397106	0.109766	0	0	0	0	0	0	0	0	0	6.01456	4.93795	4.28602	6.01456
ed9062f6f5f6326cbdd3d1e2a24aa902	19	TTGATCCTGGCTCAGAGTGAACGCTGGCGGCGTGCTTAACACATGCAAGTCGAACGAGAACGGTCCTAGCTTGCTAGGATGTCAGCTAAGTGGCGGACGGGTGAGTAATGTATAGTTAATCTGCCCTTTAGAGAGGGATAACAGTTAGAAATGACTGCTAATACCTCATACTCCTTTTTAATTAATTTAAATTGGGAAATGTTTTTTCGCTAAAGGATGAGACTATATGGTATCAGGTAGTTGGTGGGGTAAGAGCCTACCAAGCCAATGACACCTAGCTGGTCTGAGAGGATGATCAGCCACACTGGAACTGAGACACGGTCCAGACTCCTACGGGAGGCAGCAGTGGGGAATATTGCACAATGGGGGAAACCCTGATGCAGCAACGCCGCGTGGAGG…	0.020985	0	0	0	0	6.85407	3.74697	4.32597	0	0.00447381	0	0	0	0	6.85407
93acfa192f9520d119fa8cd00f7667f5	20	TTGATCCTGGCTCAGAGTGAACGCTGGCGGCGTGCTTAACACATGCAAGTCGAACGGTAGCAGCAGTCTTCGGACTGGCTGACGAGTGGCGAACGGGTGAGTAAAGTATAGTTAATTTGCCTTTAGGATAGGGATAGCCATTGGAAACGATGATTAATACCTAATATACCTTATTTAGTAAATAAGTAAGGGAAATGCTTTTGTGCCTAAAGATAAGACTATATGGTATCAGGTAGTTGGTGGGGTAAGAGCCTACCAAGCCAATGACGCCTAGCTGGTCTGAGAGGATGATCAGCCACACTGGAACTGAGACACGGTCCAGACTCCTACGGGAGGCAGCAGTGGGGAATATTGCACAATGGAGGGAACTCTGATGCAGCAACGCCGCGTGGAGGATGA…	0	0	0	0	0	3.62522	5.34654	5.38696	0.00186584	0.00801124	0	0	0	0	5.38696
0f65da327bef783aa4fd61ebb257d8bd	21	TTGATCCTGGCTCAGAGTGAACGCTGGCGGCGTGCTTAACACATGCAAGTCGAACGGTAACAGCAGTGCTTGCACTGGCTGACGAGTGGCGAACGGGTGAGTAAAGTATAGTTAATTTGCCTCTAGGAGAGGGATAGCCATTGGAAACGATGATTAATACCTCATATACCTTATTTAGTAAATAAGTAAGGGAAATGCTTTTGTGCCTAGAGATAAGACTATATGGTATCAGGTAGTTGGTGGGGTAAGAGCCTACCAAGCCGATGACGCCTAGCTGGTCTGAGAGGATGATCAGCCACACTGGAACTGAGACACGGTCCAGACTCCTACGGGAGGCAGCAGTGGGGAATATTGCACAATGGAGGGAACTCTGATGCAGCAACGCCGCGTGGAGGATGA…	0	0	4.74024	5.07611	6.65988	0	0	0	0	0	0	0	0	0	6.65988
a51e94a32faaa4565f9bb8cd64f493b9	22	TTGATCCTGGCTCAGATTGAACGCTGGCGGCATGCTTAACACATGCAAGTCGAACGGAAACGCGAAGAGCTTGCTCTTTGGCGTCGAGTGGCGGACGGGTGAGTAACGCGTGGGAATCTACTCAGTAGTGGGGGATAGCCAGGAGAAATCCTGATTAATACCGCATACGATCTACGGATGAAAGGTGGCCACTCCTTGGAAGCTATCGCTATTGAATGAGCCCGCGTTAGATTAGCTAGTTGGTGGGGTAAAGGCCTACCAAGGCGACGATCTATAGCTGGTCTGAGAGGACGACCAGCCACATCGGGACTGAGACACGGCCCGGACTCCTACGGGAGGCAGCAGTGGGGAATATTGGACAATGGGCGCAAGCCTGATCCAGCAATGCCGCGTGTGTGA…	0.00860385	0	0	0	0	0.503423	1.14986	0.89925	0	0	0	2.98498	4.94901	2.74416	4.94901
b0794531d2eea6699217cdc9b8e1500b	23	TTGATCCTGGCTCAGGATGAACGCTAGCGGGAGGCTTAATACATGCAAGTCGAACGGTAACATGAGAGCTTGCTCTTGATGACGAGTGGCGCACGGGTGAGTAACGCGTACACGATCTACCATTTGGTGTGGGATAGCCCCGGGAAACTGGGATTAATACCGCATAGTATTACATTTTTTAGAACGATGTAATTAAAGAATTTCGCCAAATGATGAGTGTGCGTCCTATTAGCTAGTTGGTAAGGTAACGGCTTACCAAGGCGATGATAGGTAGGGGGCGTGAGAGCGTGATCCCCCACACGGGTACTGAGACACGGACCCGACTCCTACGGGAGGCAGCAGTAAGGAATATTGGACAATGGGGGCAACCCTGATCCAGCCATCCCGCGTGAAGGATGA…	0	0	4.06314	4.66675	5.06377	0.11841	0.294064	0.179225	0	0	0	0	0.00869918	0	5.06377
15080a86a37852c87bba5d33282736cb	24	TTGATCCTGGCTCAGGATGAACGCTAGCGGCAGGCCTAATACATGCAAGTCGAACGGTAACATGTCCTTCGGGATGATGACGAGTGGCGCACGGGTGAGTAACACGTACACAACCTACCTTATAGAGGGGCATAGCCTCGGGAAACTGAGAGTAATACCCCATAGTATTAAGACAAGGCATCTTGTTTTGATTAAAACTACGGTGCTATGAGATGGGTGTGCGGACCATTAGCTAGTTGGTAGTGTAACGGACTACCAAGGCGACGATGGATAGGGGGCGTGAGAGCGTGATCCCCCACACGGGTACTGAGACACGGACCCGACTCCTACGGGAGGCAGCAGTAAGGAATATTGGGCAATGGGGGCAACCCTGACCCAGCCATGCCGCGTGAAGGATGA…	0	0.0078761	2.54558	3.19274	3.0212	0.83486	1.75323	0.967218	0	0.0017167	0	0.309353	0.795742	0.140583	3.19274
2f3149babe3f2081bb23d26620b7e602	25	TTGATCCTGGCTCAGAGTGAACGCTGGCGGCGTGCTTAACACATGCAAGTCGAACGAGAACGGTCCTAGCTTGCTAGGATGTCAGCTAAGTGGCGGACGGGTGAGTAATGTATAGTTAATCTGCCCTTTAGAGGGGGATAACTACTGGAAACGGTAGCTAATACCCCATACTCCTTTTACCTTAATGGTAATTGGGAAATGTTTTTTCGCTAAAGGATGAGACTATATGGTATCAGGTAGTTGGTGGGGTAAGAGCCTACCAAGCCAATGACGCCTAGCTGGTCTGAGAGGATGATCAGTCACACTGGAACTGAGACACGGTCCAGACTCCTACGGGAGGCAGCAGTGGGGAATATTGCACAATGGGGGAAACCCTGATGCAGCAACGCCGCGTGGAGG…	0.0365838	0	0	0	0	0	0	0	0	0	0	2.3087	2.72134	7.58959	7.58959
45aedf918dd4ef50935c71c79480f53f	26	TTGATCCTGGCTCAGATTGAACGCTGGCGGCATGCTTAACACATGCAAGTCGAACGGAAACAGCAAGAGCTTGCTCTTGGCTGTCGAGTGGCGGACGGGTGAGTAACGCGTGGGAATCTACTCAGTAGTGGGGGATAGCCAGGAGAAATCCTGATTAATACCGCATACGATCTACGGATGAAAGGTGGCCTCTCCTTGGAAGCTATCGCTATTGAATGAGCCCGCGTTAGATTAGCTAGTTGGTGGGGTAAAGGCTTACCAAGGCGACGATCTATAGCTGGTCTGAGAGGACGACCAGCCACATCGGGACTGAGACACGGCCCGGACTCCTACGGGAGGCAGCAGTGGGGAATATTGGACAATGGGCGCAAGCCTGATCCAGCAATGCCGCGTGTGTGA…	8.11888	7.53366	0	0	0	0	0	0	0	0	0	0	0	0	8.11888
967333fd90b49ad7b2286648c795cb55	27	TTGATCCTGGCTCAGGATGAACGCTAGCGGCAGGCCTAATACATGCAAGTCGAACGGTAACAGCAGAGCTTGCTCTGGCTGACGAGTGGCGCACGGGTGAGTAACACGTACACAACCTACCTTTTAGAGGGGGATAGCCTCGGGAAACTGAGAGTAATACCCCATAGTATTGTGAAACGGCATCGTTTTACAATTAAAATTGAGGTGCTAAGAGATGGGTGTGCGGGTCATTAGCTAGTTGGTAGTGTAATGGACTACCAAGGCGACGATGACTAGGGGGCGTGAGAGCGTGATCCCCCACACGGGTACTGAGACACGGACCCGACTCCTACGGGAGGCAGCAGTAAGGAATATTGGGCAATGGGGGCAACCCTGACCCAGCCATGCCGCGTGAAGGAT…	0	0	3.89417	3.9891	3.05761	0	0	0	0	0	0	0.0010864	0	0	3.9891
6f2de3c5c224198147baf7f3030d687d	28	TTGATCCTGGCTCAGAGTGAACGCTGGCGGCGTGCTTAACACATGCAAGTCGAACGGTAACAGCAGTGCTTGCACTGGCTGACGAGTGGCGAACGGGTGAGTAATGTATAGTTAATTTGCCTCTAGGAGAGGGATAGCCATTGGAAACGATGATTAATACCTCATATACCTTGTATAGTAAATATATAAGGGAAATGCTTTTGTGCCTAGAGATAAGACTATATGGTATCAGGTAGTTGGTGGGGTAAGAGCCTACCAAGCCGATGACGCCTAGCTGGTCTGAGAGGATGATCAGCCACACTGGAACTGAGACACGGTCCAGACTCCTACGGGAGGCAGCAGTGGGGAATATTGCACAATGGAGGAAACTCTGATGCAGCAACGCCGCGTGGAGGATGA…	0	0	2.98292	3.258	3.5458	0	0	0	0	0	0	0.00230861	0	0	3.5458
0d119a3ee8bbeca8ceb4cce30bc1aca4	29	TTGATCCTGGCTCAGATTGAACGCTGGCGGCATGCTTAACACATGCAAGTCGAACGGAAACGCGAAGAGCTTGCTCTTTGGCGTCGAGTGGCGGACGGGTGAGTAACGCGTGGGAATCTACTCAGTAGTGGGGGATAGCCAGGAGAAATCCTGATTAATACCGCATACGATCTACGGATGAAAGGTGGCCTCTACATGTAAGCTATCGCTATTGAATGAGCCCGCGTTAGATTAGCTAGTTGGTAGGGTAAAGGCCTACCAAGGCGACGATCTATAGCTGGTCTGAGAGGACGACCAGCCACATCGGGACTGAGACACGGCCCGGACTCCTACGGGAGGCAGCAGTGGGGAATATTGGACAATGGGCGCAAGCCTGATCCAGCAATGCCGCGTGTGTGA…	0	0	2.58417	3.20412	3.96667	0	0	0	0	0	0	0	0	0	3.96667
9c1e3ea7e3a0a31ab7430fbab22e6421	30	TTGATCCTGGCTCAGAGTGAACGCTGGCGGCGTGCTTAACACATGCAAGTCGAACGGTAACAGATAGTACTTGTACTATGCTGACGAGTGGCGAACGGGTGAGTAATGTATAGTTGATTTGCCTTTAGGATAGGGATAGCCATTGGAAACGATGATTAATACCTAATATACCTTATTTAGTAAATAAGTAAGGGAAATGCTTTCGTGCCTAAAGATAAGACTATATGGTATCAGGTAGTTGGTGGGGTAAGAGCCTACCAAGCCAATGACGCCTAGCTGGTCTGAGAGGATGATCAGCCACACTGGAACTGAGACACGGTCCAGACTCCTACGGGAGGCAGCAGTGGGGAATATTGCACAATGGAGGAAACTCTGATGCAGCAACGCCGCGTGGAGGAT…	0.0217544	0	0	0	0	1.88865	3.05627	2.80308	0	0.00379754	0	0	0.00558466	0	3.05627
139521e16117bf2a3c99a6474be34864	31	TTGATCCTGGCTCAGAACGAACGCTGGCGGCAGGCCTAACACATGCAAGTCGAGCGCACCTTCGGGTGAGCGGCGGACGGGTTAGTAACGCGTGGGAACATACCCTTTTCTACGGAATAGCCTCGGGAAACTGAGAGTAATACCGTATAAGCCCTTCGGGGGAAAGATTTATCGGGAAAGGATTGGCCCGCGTTAGATTAGATAGTTGGTGGGGTAATGGCCTACCAAGTCTACGATCTATAGCTGGTTTTAGAGGATGATCAGCAACACTGGGACTGAGACACGGCCCAGACTCCTACGGGAGGCAGCAGTGGGGAATCTTAGACAATGGGCGCAAGCCTGATCTAGCCATGCCGCGTGTGTGATGAAGGTCTTAGGATCGTAAAGCACTTTCGCCAG…	0	0	0	0	0	0	0	0	3.8694	3.78188	2.30684	0	0	0	3.8694
ef5dff1542a373e0a2295bb72c9aaa7e	32	TTGATCCTGGCTCAGATTGAACGCTGGCGGCATGCTTAACACATGCAAGTCGAACGGAAACGCGAAGAGCTTGCTCTTTGGCGTCGAGTGGCGGACGGGTGAGTAACGCGTGGGAATCTACTCAGTAGTGGGGGATAGCCAGGAGAAATCCTGATTAATACCGCATACGATCTACGGATGAAAGGTGGCCTCTACATGTAAGCTATCGCTATTGAATGAGCCCGCGTTAGATTAGCTAGTTGGTAGGGTAAAGGCCTACCAAGGCGACGATCTATAGCTGGTCTGAGAGGACGACCAGCCACATCGGGACTGAGACACGGCCCGGACTCCTACGGGAGGCAGCAGTGGGGAATATTGGACAATGGGCGCAAGCCTGATCCAGCAATGCCGCGTGTGTGA…	0	0	2.39905	3.04251	3.51681	0	0	0	0	0	0	0	0	0	3.51681
3d37a18b439734f255c2c86f3af5654e	33	TTGATCCTGGCTCAGATTGAACGCTGGCGGCATGCTTAACACATGCAAGTCGAACGGTAACGATAGGTACTTGTACCTAGGCGACGAGTGGCGGACGGGTGAGTAACGCGTGGGAATCTACCCAGTAGTGGAGGATAGCCCAGAGAAATTTGGATTAATACTGCATGTGATCTACGGATGAAAGGTGGCCTCTCCTTGGAAGCTATCGCTATTGGATGAGCCCGCGTTAGATTAGCTAGTTGGTGGGGTAAGAGCCTGCCAAGGCGACGATCTATAGCTGGTCTGAGAGGACGACCAGCCACATCGGGACTGAGACACGGCCCGGACTCCTACGGGAGGCAGCAGTGGGGAATATTGGACAATGGGCGCAAGCCTGATCCAGCAATGCCGCGTGTGTGA…	0	0	3.122	2.95768	2.69076	0	0	0	0	0	0	0	0	0	3.122
2ecd1c084c337ae70eb175898cf8abae	34	TTGATCCTGGCTCAGAGTGAACGCTGGCGGCGTGCTTAACACATGCAAGTCGAACGGAAACAGCAGTGCTTGCACTGGCTGTCGAGTGGCGCACGGGTGAGTAATGTATAGCTTACGTGCCCCATAGAGGGGGATAACTACTAGAAATGGTAGCTAATACCCCATACTCCTTATAGTAGGGATACTATAAGGGAAAGGAGTAATCCGCTATGGGATCGGGCTATATCGTATCAGCTAGTTGGTGGGGTAAAGGCTCACCAAGGCTATGACGCGTAGCTGGTCTGAGAGGATGATCAGCCACACTGGAACTGAGACACGGTCCAGACTCCTACGGGAGGCAGCAGTGGGGAATATTGCACAATGGGGGAAACCCTGATGCAGCAACGCCGCGTGGAGGAT…	0.0409207	0.00732145	0	0	0	0	0	0	0	0	0	2.91867	3.58145	0.870189	3.58145
96dc0640b2af1c53213da03d4c948be9	35	TTGATCCTGGCTCAGGATGAACGCTAGCGGCAGGCTTAACACATGCAAGTCGAGGGGTAACAGGGAGAGCTTGCTTTCCGCTGACGACCGGCGCACGGGTGCGTAACGCGTATAGAATCTGCCTTATACAGAGGGATAGCCCAGAGAAATTTGGATTAATACCTCATAGTACTATTTTATGGCATCATATTAATAGTTAAAGATTTATCGGTATAAGATGACTATGCGTCCTATTAGCTAGATGGTAAGGTAACGGCTTACCATGGCGACGATAGGTAGGGGCCCTGAGAGGGGGATCCCCCACACTGGTACTGAGACACGGACCAGACTCCTACGGGAGGCAGCAGTGAGGAATATTGGGCAATGGAGGCAACTCTGACCCAGCCATGCCGCGTGCAG…	0.05589	0.0349987	0	0	0	1.56453	0.846109	1.35078	0	0.00104042	0	1.77143	1.20299	0.519891	1.77143
1f032f7c4d7487265e74cdd21a5e5d57	36	TTGATCCTGGCTCAGGATGAACGCTAGCGGCAGGCCTAACACATGCAAGTCGAACGGCAGCGGGAAGGAGCTTGCTCCTTTGCCGGCGAGTGGCGCACGGGTGCGTAACGCGTATACAACCTACCTTATACAGGGGTATAGCCCAGGGAAACTTGGATTAACACCCCATAGTAATATGTTTTGGCATCATTACATATTTAAAACTACGGTGGTATAAGATGGGTATGCGTCCCATTAGCTTGTTGGTGTGGTAACGGCACACCAAGGCAACGATGGGTAGGGGCCCTGAGAGGGGGATCCCCCACACTGGTACTGAGACACGGACCAGACTCCTACGGGAGGCAGCAGTGAGGAATATTGGACAATGGGCGGGAGCCTGATCCAGCCATGCCGCGTGCA…	0	0	0	0	0	0	0	0	3.20191	3.59705	2.15689	0	0	0	3.59705
d5f61bf094ad8ad97edffe6f9f9981f3	37	TTGATCCTGGCTCAGGATGAACGCTAGCGGCAGGCTTAACACATGCAAGTCGAGGGGTAGCAGGGAGCTTGCTCCGCTGACGACCGGCGAACGGGTGCGTAACGCGTATAGAATCTACCTCTTACTAAGGGATAGCCCAGAGAAATTTGGATTAATATCTTATAGTATGTTAACTTGGCATCAAGATAACATTAAAGGTTACGGTAAGAGATGACTATGCGTCCTATTAGCTAGATGGTGTGGTAACGGCACACCATGGCAACGATAGGTAGGGGCCCTGAGAGGGGGATCCCCCACACTGGTACTGAGACACGGACCAGACTCCTACGGGAGGCAGCAGTGAGGAATATTGGACAATGGAGGCAACTCTGATCCAGCCATGCCGCGTGCAGGAAGACT…	0	0	0	0	0	0	0	0	2.37937	2.31067	3.69392	0	0	0	3.69392
261aa3bdb56a4b847140840ff4ece20a	38	TTGATCCTGGCTCAGAGTGAACGCTGGCGGCGTGCTTAACACATGCAAGTCGAACGGTAGCAGCAGTACTTGTACTGGCTGACGAGTGGCGAACGGGTGAGTAATGTATAGTTGATTTGCCTCTAGGATAGGGATAGCCATTGGAAACGATGATTAATACCTAATATACCTTATTTAGTAAATAAGTAAGGGAAATGCTTTTGTGCCTAGAGATAAGACTATATGGTATCAGGTAGTTGGTGGGGTAAGAGCCTACCAAGCCAATGACGCCTAGCTGGTCTGAGAGGATGATCAGCCACACTGGAACTGAGACACGGTCCAGACTCCTACGGGAGGCAGCAGTGGGGAATATTGCACAATGGAGGGAACTCTGATGCAGCAACGCCGCGTGGAGGATGA…	0	0.011315	0	0	0	1.85443	2.43214	2.40363	0	0.00343339	0	0	0	0	2.43214
69c6f22883db7e835444d41de80a7880	39	TTGATCCTGGCTCAGATTGAACGCTGGCGGCATGCTTAACACATGCAAGTCGAACGGAAACAGCAAGAGCTTGCTCTTGGCTGTCGAGTGGCGGACGGGTGAGTAACGCGTGGGAATCTACCCAATAGTGGGGGACAAGCCAGGGAAACTTGGTCTAATACCGCATACACTCTACGGAGTAAAGGTGGCCTCTATTTATAAGCTATCGCTATTGGATGAGCCCGCGTTAGATTAGCTAGTTGGTGGGGTAAAGGCCTACCAAGGCAACGATCTATAGCTGGTCTGAGAGGACGACCAGCCACATCGGGACTGAGACACGGCCCGGACTCCTACGGGAGGCAGCAGTGGGGAATATTGGACAATGGGCGCAAGCCTGATCCAGCAATGCCGCGTGTGTGA…	0	0	0	0	0	1.15019	2.86855	2.43235	0	0.00478594	0	0	0	0	2.86855
031164ce3b7b888f22e4b7a3f3c7653c	40	TTGATCCTGGCTCAGATTGAACGCTGGCGGCATGCTTAACACATGCAAGTCGAACGGAAACGCGAAGAGCTTGCTCTTTGGCGTCGAGTGGCGGACGGGTGAGTAACGCGTGGGAATCTACTCAGTAGTGGGGGATAGCCAGGAGAAATCCTGATTAATACCGCATACGATCTACGGATGAAAGGTGGCCTCTACATGTAAGCTATCGCTATTGAATGAGCCCGCGTTAGATTAGCTAGTTGGTGGGGTAAAGGCCTACCAAGGCGACGATCTATAGCTGGTCTGAGAGGACGACCAGCCACATCGGGACTGAGACACGGCCCGGACTCCTACGGGAGGCAGCAGTGGGGAATATTGGACAATGGGCGCAAGCCTGATCCAGCAATGCCGCGTGTGTGA…	0	0	0	0	0	1.61193	3.17953	1.6944	0	0.00348541	0	0	0	0.050809	3.17953
2be800ed59f64195e2fed36e396b019a	41	TTGATCCTGGCTCAGAGTGAACGCTGGCGGCGTGCTTAACACATGCAAGTCGAACGGTAACAGAAGTAGCTTGCTACTTGCTGACGAGTGGCGAACGGGTGAGTAAAGTATAGTTGATTTGCCTTTAGGATAGGGATAGCCATTGGAAACGATGATTAATACCTAATATACCTTGCTTAGTAAATAAGTAAGGGAAATGCTTTTGTGCCTAAAGATAAGACTATATGGTATCAGGTAGTTGGTGGGGTAAGAGCCTACCAAGCCAATGACGCCTAGCTGGTCTGAGAGGATGATCAGCCACACTGGAACTGAGACACGGTCCAGACTCCTACGGGAGGCAGCAGTGGGGAATATTGCACAATGGAGGGAACTCTGATGCAGCAACGCCGCGTGGAGGAT…	0	0	0	0	0	1.75249	1.95588	2.24792	0	0	0	0	0	0	2.24792
5d0f4b2a464efeaa16a1a9cda638c551	42	TTGATCCTGGCTCAGATTGAACGCTGGCGGCATGCTTAACACATGCAAGTCGAACGGAAACGCGAAGAGCTTGCTCTTTGGCGTCGAGTGGCGGACGGGTGAGTAACGCGTGGGAATCTACCCAGTAGTGGGGGATAGCCCAGAGAAATTTGGATTAATACCGCATACGATCTACGGATGAAAGGTGGCCTCTCCTTGGAAGCTATCGCTATTGGATGAGCCCGCGTTAGATTAGCTAGTTGGTGGGGTAAGAGCCTACCAAGGCGACGATCTATAGCTGGTCTGAGAGGACGACCAGCCACATCGGGACTGAGACACGGCCCGGACTCCTACGGGAGGCAGCAGTGGGGAATATTGGACAATGGGCGCAAGCCTGATCCAGCAATGCCGCGTGTGTGA…	0.281059	0.134282	2.09641	2.38283	2.08944	0	0	0	0	0	0	0	0	0	2.38283
2005fabf6b36068585e325aaa270899f	43	TTGATCCTGGCTCAGATTGAACGCTGGCGGCATGCTTAACACATGCAAGTCGAACGGAAACGCGAAGAGCTTGCTCTTTGGCGTCGAGTGGCGGACGGGTGAGTAACGCGTGGGAATCTACCCAGTAGTGGGGGATAGCCCAGAGAAATTTGGATTAATACCGCATACGATCTACGGATGAAAGGTGGCCTCTCCTTGGAAGCTATCGCTATTGGATGAGCCCGCGTTAGATTAGCTAGTTGGTGGGGTAAGAGCCTACCAAGGCAACGATCTATAGCTGGTCTGAGAGGACGACCAGCCACATCGGGACTGAGACACGGCCCGGACTCCTACGGGAGGCAGCAGTGGGGAATATTGGACAATGGACGAAAGTCTGATCCAGCAATGCCGCGTGTGTGA…	0	0	2.11112	2.07123	2.63022	0	0	0	0	0	0	0	0	0	2.63022
c1c5cf58801a255ef6d0bbb0f08a2668	44	TTGATCCTGGCTCAGGATGAACGCTAGCGGCAGGCTTAACACATGCAAGTCGAGGGGTAACATTACAGCTTGCTGTAGATGACGACCGGCGCACGGGTGCGTAACGCGTATACAATTTGCCTTATACTGGAGAATAGCCCTGAGAAATTGGGATTAATGCTCCATAGTATCTTAAAACGGCCTCGTTTAAAGATTAAAGCTCCGGCGGTATAAGATGAGTATGCGTCCTATTAGTTTGTTGGTGAGGTAACGGCTCACCAAGACTACGATAGGTAGGGGTCCTGAGAGGGAGATCCCCCACACTGGTACTGAGACACGGACCAGACTCCTACGGGAGGCAGCAGTGAGGAATATTGGGCAATGGAGGCAACTCTGACCCAGCCATGCCGCGTGAAGGAA…	0.0399414	0.0229627	0.0127208	0.0106156	0	2.01937	1.04737	1.51278	0	0	0	0.540893	0.441367	0.358924	2.01937
6799a0d77aa83cdd5bcace8aeb99b778	45	TTGATCCTGGCTCAGATTGAACGCTGGCGGCATGCTTAACACATGCAAGTCGAACGGAAACGCGAAGAGCTTGCTCTTTGGCGTCGAGTGGCGGACGGGTGAGTAACGCGTGGGAATCTACCCAGTAGTGGAGGATAGCCAGGAGAAATCCTGATTAATACTGCATACGATCTACGGATGAAAGGTGGCCTCTCCTTGGAAGCTATCGCTATTGGATGAGCCCGCGTTAGATTAGCTAGTTGGTGGGGTAATGGCCTACCAAGGCGACGATCTATAGCTGGTCTGAGAGGATGATCAGCCACATCGGGACTGAGACACGGCCCGGACTCCTACGGGAGGCAGCAGTGGGGAATATTGGACAATGGGCGCAAGCCTGATCCAGCAATGCCGCGTGTGTGA…	0	0	0	0	0	0	0	0	1.69684	0.425012	4.21507	0	0	0	4.21507
ba7b981b2a300bdbbf66808686f3c6ce	46	TTGATCCTGGCTCAGAACGAACGCTGGCGGCAGGCCTAACACATGCAAGTCGAGCGCACCTTCGGGTGAGCGGCGGACGGGTTAGTAACGCGTGGGAATATACCCAGTTCTAAGGAATAGCCACTGGAAACGGTGAGTAATACCTTATACGCCCTTCGGGGGAAAGATTTATCGGAATTGGATTAGCCCGCGTTAGATTAGATAGTTGGTGGGGTAACGGCCTACCAAGTCGACGATCTATAGCTGGTTTGAGAGGATGATCAGCAACACTGGGACTGAGACACGGCCCAGACTCCTACGGGAGGCAGCAGTGGGGAATCTTAGACAATGGGCGCAAGCCTGATCTAGCCATGCCGCGTGAGTGATGAAGGCCCTAGGGTCGTAAAGCTCTTTCGCCAG…	0	0	0	0	0	0	0	0	4.5322	0.433179	2.0828	0	0	0	4.5322
38b6fcd0eb4cf621d8dbfb432ea8c27c	47	TTGATCCTGGCTCAGATTGAACGCTGGCGGCATGCTTAACACATGCAAGTCGAACGGAAACGCGAAGAGCTTGCTCTTTGGCGTCGAGTGGCGGACGGGTGAGTAACGCGTGGGAATCTACCCAGTAGTGGGGGATAGCCCAGAGAAATTTGGATTAATACCGCATACGATCTACGGATGAAAGGTGGCCTCTCCTTGGAAGCTATCGCTATTGGATGAGCCCGCGTTAGATTAGCTAGTTGGTGGGGTAAGAGCCTACCAAGGCGACGATCTATAGCTGGTCTGAGAGGACGACCAGCCACATCGGGACTGAGACACGGCCCGGACTCCTACGGGAGGCAGCAGTGGGGAATATTGGACAATGGACGAAAGTCTGATCCAGCAATGCCGCGTGTGTGA…	0.166411	0.226466	0	0	0	1.28182	1.58429	1.35046	0	0.00182074	0	0.398076	0.11334	0.370167	1.58429
554958dbb2aa6873d3469f006927379b	48	TTGATCCTGGCTCAGATTGAACGCTGGCGGCATGCTTAACACATGCAAGTCGAACGGAAACGCGAAGAGCTTGCTCTTTGGCGTCGAGTGGCGGACGGGTGAGTAACGCGTGGGAATCTACTCAGTAGTGGGGGATAGCCAGGAGAAATTCTGATTAATACCGCATACGATCTACGGATGAAAGGTGGCCTCTACATGTAAGCTATCGCTATTGAATGAGCCCGCGTTAGATTAGCTAGTTGGTAGGGTAAAGGCCTACCAAGGCGACGATCTATAGCTGGTCTGAGAGGACGACCAGCCACATCGGGACTGAGACACGGCCCGGACTCCTACGGGAGGCAGCAGTGGGGAATATTGGACAATGGGCGCAAGCCTGATCCAGCAATGCCGCGTGTGTGA…	0.0230835	0.034555	0.0735716	0.0689067	0.0948061	0	0	0	0	0	0	1.42826	2.19323	1.16238	2.19323
1a23127d73fffa87217736b9718e27aa	49	TTGATCCTGGCTCAGAACGAACGCTGGCGGCACGCCTAACACATGCAAGTCGAGCGCCCTTTTCGGAGGGAGCGGCGGACGGGTTAGTAACGCGTGGGAACATACCCTTTTCTAAGGAATAGCCACTGGAAACGGTGAGTAATACCTTATACGGCCTTCGGGCGAAAGATTTATCGGTGAAGGATTGGCCCGCGTTAGATTAGTTAGTTGGTGGGGTAACGGCCTACCAAGACGACGATCTATAGCTGGTTTGAGAGGATGATCAGCAACACTGGGACTGAGACACGGCCCAGACTCCTACGGGAGGCAGCAGTGGGGAATCTTAGACAATGGGCGCAAGCCTGATCTAGCGATGCCGCGTGTGTGATGAAGGCCTTAGGGTCGTAAAGCACTTTCGCC…	0	0	0	0	0	0	0	0	1.83443	2.67211	1.64082	0	0	0	2.67211
4cb43ef2e8f9f623ac9a25f86735864e	50	TTGATCCTGGCTCAGATTGAACGCTGGCGGCATGCTTAACACATGCAAGTCGAACGGAAACGCGAAGAGCTTGCTCTTTGGCGTCGAGTGGCGGACGGGTGAGTAACGCGTGGGAATCTACTCAGTAGTGGGGGATAGCCAGGAGAAATCCTGATTAATACCGCATACGATCTACGGATGAAAGGTGGCCTCTACATGTAAGCTATCGCTATTGAATGAGCCCGCGTTAGATTAGCTAGTTGGTAGGGTAAAGGCCTACCAAGGCGACGATCTATAGCTGGTCTGAGAGGACGACCAGCCACATCGGGACTGAGACACGGCCCGGACTCCTACGGGAGGCAGCAGTGGGGAATATTGGACAATGGGCGCAAGCCTGATCCAGCAATGCCGCGTGTGTGA…	0	0	1.40693	1.79849	2.10262	0	0	0	0	0	0	0	0	0	2.10262
85ad0d8ad0123fef5df4ffd3fc0ba82e	51	TTGATCCTGGCTCAGAGCGAACGCTGGCGGCAGGCTTAACACATGCAAGTCGAGCGGGCATCTTCGGATGTCAGCGGCAGACGGGTGAGTAACACGTGGGAACGTACCCTTCGGTTCGGAATAACGCTGGGAAACTAGCGCTAATACCGGATACGCCCTTTTGGGGAAAGGTTTACTGCCGAAGGATCGGCCCGCGTCTGATTAGCTAGTTGGTGGGGTAACGGCCTACCAAGGCGACGATCAGTAGCTGGTCTGAGAGGATGATCAGCCACACTGGGACTGAGACACGGCCCAGACTCCTACGGGAGGCAGCAGTGGGGAATATTGGACAATGGGCGCAAGCCTGATCCAGCCATGCCGCGTGAGTGATGAAGGCCTTAGGGTTGTAAAGCTCTTTTG…	0	0	0	0	0.00102759	0	0	0	0	5.90293	0.00408226	0	0	0.00334721	5.90293
925ee8d3e6f218926f41837f72128e50	52	TTGATCCTGGCTCAGAGTGAACGCTGGCGGCGTGCTTAACACATGCAAGTCGAACGAGAACGGATATTAGCTTGCTAATATTGTCAGCTAAGTGGCGCACGGGTGAGTAATATATAGTTAATCTGCCTTAGAGATGGGAATAATTGTTGGAAACGACTTGTAAGACCCGATATGCCTTTAATACATAAGTATGCAAGGGAAACATTTATGGCTCTAAGATGAGACTGTACAGTATCAGCTAGTTGGTGAGGTAATGGCTCACCAAGGCTATGACGCTTAACTGGTTTGAGAGGATGATCAGTCACACTGGAACTGAGACACGGTCCAGACTCCTACGGGAGGCAGCAGTGGGGAATATTGCACAATGGACGAAAGTCTGATGCAGCAACGCCGCGTGGA…	0	0.0245158	0	0	0	1.82354	1.35262	1.40439	0	0.00150861	0	0	0	0.0209844	1.82354
9e5bf7c791aec62733a0523c3de63f90	53	TTGATCCTGGCTCAGGATGAACGCTAGCGGCAGGCTTAACACATGCAAGTCGAGGGGTAACATTACAGCTTGCTGTAGATGACGACCGGCGCACGGGTGCGTAACGCGTATACAATTTGCCTTATACTGGAGAATAGCCCTGAGAAATTGGGATTAATGCTCCATAGTATCTTAAAACGGCCTCGTTTAAAGATTAAAGCTCCGGCGGTATAAGATGAGTATGCGTCCTATTAGTTAGTTGGTGAGGTAACGGCTCACCAAGACTACGATAGGTAGGGGTCCTGAGAGGGAGATCCCCCACACTGGTACTGAGACACGGACCAGACTCCTACGGGAGGCAGCAGTGAGGAATATTGGGCAATGGAGGCAACTCTGACCCAGCCATGCCGCGTGAAGGAA…	0.0119614	0.00809797	0.0113917	0.00582911	0.00831006	0.481919	1.22576	0.871736	0	0.00343339	0	0.82707	0.716913	0.211775	1.22576
b51d850f082dfb3426e650099c4a4c5e	54	TTGATCCTGGCTCAGGATGAACGCTAGCGGCAGGCTTAACACATGCAAGTCGAGGGGTAACATTGTGCTTGCACAGATGACGACCGGCGCACGGGTGCGTAACGCGTATAGAACCTACCTTTTACAGAGGGATAGCCTTTAGAAATGAAGATTAATACCTCATAGTATTGCGATTTGGCATCAGATTGTAATTAAAGATTTATCGGTAAAAGATGGCTATGCGTCCTATTAGTTAGTTGGTAAGGTAACGGCTTACCAAGACATCGATAGGTAGGGGTCCTGAGAGGGAGATCCCCCACACTGGTACTGAGACACGGACCAGACTCCTACGGGAGGCAGCAGTGAGGAATATTGGACAATGGAGGAGACTCTGATCCAGCCATGCCGCGTGCAGGAAGA…	0	0	0	0	0	0	0	0	1.38704	2.18769	1.64014	0	0	0	2.18769
95c989675507d88fcc185bef74809c74	55	TTGATCCTGGCTCAGAGTGAACGCTGGCGGCGTGCTTAACACATGCAAGTCGAACGGTAACAGCAGTGCTTGCACTGGCTGACGAGTGGCGAACGGGTGAGTAATGTATAGTTGATTTGCCTCTAGGATAGGGATAGCCATTGGAAACGATGATTAATACCTAATACACCTTGCTTAGTAAATAAGTAAGGGAAATGCTTTCGTGCCTAGAGATAAGACTATATGGTATCAGGTAGTTGGTGGGGTAAGAGCCTACCAAGCCAATGACGCCTAGCTGGTCTGAGAGGATGATCAGCCACACTGGAACTGAGACACGGTCCAGACTCCTACGGGAGGCAGCAGTGGGGAATATTGCACAATGGAGGAAACTCTGATGCAGCAACGCCGCGTGGAGGATGA…	0	0.0102057	0	0	0	1.92667	0.608214	1.45895	0	0.000520211	0	0	0	0	1.92667
f00bbd6221b586a0d4dad83b1b2da5f2	56	TTGATCCTGGCTCAGGATGAACGCTAGCGGCAGGCTTAACACATGCAAGTCGAGGGGTAGCAGGGAGCTTGCTCCGCTGACGACCGGCGAACGGGTGCGTAACGCGTATAGAATCTACCTCTTACTAAGGGATAGCCCAGAGAAATTTGGATTAATATCTTATAGTATGTTAACTTGGCATCAAGATGACATTAAAGGTTACGGTAAGAGATGACTATGCGTCCTATTAGCTAGATGGTGTGGTAACGGCACACCATGGCAACGATAGGTAGGGGCCCTGAGAGGGGGATCCCCCACACTGGTACTGAGACACGGACCAGACTCCTACGGGAGGCAGCAGTGAGGAATATTGGACAATGGAGGCAACTCTGATCCAGCCATGCCGCGTGCAGGAAGACT…	0	0	0	0	0	0	0	0	1.49773	1.50044	1.75929	0	0	0	1.75929
53a865ae04a595fbc75d8f33bc3cd479	57	TTGATCCTGGCTCAGAGTGAACGCTGGCGGCGTGCTTAACACATGCAAGTCGAACGGAAACAGCAGTGCTTGCACTGGCTGTCGAGTGGCGAACGGGTGAGTAATGTATAGTTAATTTGCCTTTAGGATAGGGATAGCCATTGGAAACGATGATTAATACCTAATATACCTTTTATTGTAGTGATAAAAGGGAAATGCTTTATTGTGCCTAAAGATAAGACTATATGGTATCAGGTAGTTGGTGGGGTAAGAGCCTACCAAGCCAATGACGCCTAGCTGGTCTGAGAGGATGATCAGCCACACTGGAACTGAGACACGGTCCAGACTCCTACGGGAGGCAGCAGTGGGGAATATTGCACAATGGAGGAAACTCTGATGCAGCAACGCCGCGTGGAGGAT…	4.30381	1.9414	0	0	0	0	0	0	0	0	0	0	0	0	4.30381
6ad9245dd6ec0b528f487dd8bb237765	58	TTGATCCTGGCTCAGAGTGAACGCTGGCGGCGTGCTTAACACATGCAAGTCGAACGGTAACAGAAGTAGCTTGCTACTTGCTGACGAGTGGCGAACGGGTGAGTAATGTATAGTTGATTTGCCTTTAGGATAGGGATAGCCATTGGAAACGATGATTAATACCTAATACACCTTACTTAGTAAATAAGTAAGGGAAATGCTTTCGTGCCTAAAGATAAGACTATATGGTATCAGGTAGTTGGTGGGGTAAGAGCCTACCAAGCCGATGACGCCTAGCTGGTCTGAGAGGATGATCAGCCACACTGGAACTGAGACACGGTCCAGACTCCTACGGGAGGCAGCAGTGGGGAATATTGCACAATGGAGGAAACTCTGATGCAGCAACGCCGCGTGGAGGAT…	0	0.0265125	0	0	0	0	0	0	0	0	0	1.46375	1.39058	0.979145	1.46375
1e27670ca6f02dee239d177f1eb6e980	59	TTGATCCTGGCTCAGAACGAACGCTGGCGGCAGGCTTAACACATGCAAGTCGAGCGAGATGCTTTCTTCGGAAAGTTATCTAGCGGCGGACGGGTGAGTAACACGTGGGAACATGCCAATCACTACGGAATAGTCCCGGGAAACTGGGTTTAATACCGTATACGCCCTTCGGGGGAAAGAATTTCGGTGATTGATTGGCCCGCGCTTGATTAGATAGTTGGTGGGGTAATGGCCTACCAAGTCTACGATCAATAGCTGGTTTGAGAGGATGATCAGCCACACTGGGACTGAGACACGGCCCAGACTCCTACGGGAGGCAGCAGTGAGGAATATTGGACAATGGGGGAAACCCTGATCCAGCCATGCCGCGTGAGTGATGAAGGCCTTAGGGTCGTAAAG…	0	0	0	0	0	0	0	0	0.67032	3.74734	0.445936	0	0	0	3.74734
0c27903a9e7f2d38f3cbc96cec8d46a2	60	TTGATCCTGGCTCAGGATGAACGCTAGCGGCAGGCCTAACACATGCAAGTCGAACGGCAGCGGGAAGGAGCTTGCTCCTTTGCCGGCGAGTGGCGCACGGGTGCGTAACGCGTATACAACCTACCTTATACAGGGGTATAGCCCAGGGAAACTTGGATTAACACCTCATAGTAATATGTTTTGGCATCATTACATATTTAAAACTACGGTGGTATAAGATGGGTATGCGTCCCATTAGCTTGTTGGTGTGGTAACGGCACACCAAGGCAACGATGGGTAGGGGCCCTGAGAGGGGGATCCCCCACACTGGTACTGAGACACGGACCAGACTCCTACGGGAGGCAGCAGTGAGGAATATTGGACAATGGGCGGGAGCCTGATCCAGCCATGCCGCGTGCA…	0	0	0	0	0	0	0	0	1.69702	1.93784	1.13543	0	0	0	1.93784
7069b72fd442fc9c02564258b6f6779a	61	TTGATCCTGGCTCAGGATGAACGCTAGCGGCAGGCTTAACACATGCAAGTCGAGGGGTAACAGGGAAAAGCTTGCTTTTTTGCTGACGACCGGCGAACGGGTGCGTAACGCGTATAGAATCTGCCTTGTACAGGAGGATAGCCTTTAGAAATGAAGATTAATACTCCATAATATTGGGAAGTGGCATCACTATCTAATTAAAGATTTATCGGTACAAGATGACTATGCGTCCTATTAGCTAGATGGTAAGGTAACGGCTTACCATGGCAACGATAGGTAGGGGGTCTGAGAGGATTATCCCCCACACTGGTACTGAGACACGGACCAGACTCCTACGGGAGGCAGCAGTGAGGAATATTGGTCAATGGAGGCAACTCTGAACCAGCCATGCCGCGTGCA…	0	0	0	0	0	0	0	0	2.46099	1.97769	0.565453	0	0	0	2.46099
9f4845f345af8c79ec8950cd1f2bfe6d	62	TTGATCCTGGCTCAGGATGAACGCTAGCGGCAGGCCTAACACATGCAAGTCGAGGGGCAGCATATCTAGCTTGCTAGATGATGGCGACCGGCGCACGGGTGCGTAACGCGTATACAATCTGCCTATCACTGAGGGATAGCCCGAAGAAATTTGGATTAACACCTCATAGTATTATTAAATCGCATGGTTTACTAATTAAAGGTTACGGTGATAGATGAGTATGCGTCCTATTAGCTAGATGGTAAGGTAAAGGCTTACCATGGCTACGATAGGTAGGGGTCCTGAGAGGGAGATCCCCCACACTGGTACTGAGACACGGACCAGACTCCTACGGGAGGCAGCAGTGAGGAATATTGGACAATGGGCGCAAGCCTGATCCAGCCATGCCGCGTGTAGGAA…	0	0	0	0	0	0	0	0	1.3974	1.72497	1.33724	0	0	0	1.72497
abc827338d781a3bdd4229cb277d8949	63	TTGATCCTGGCTCAGATTGAACGCTGGCGGCATGCTTAACACATGCAAGTCGAACGGAAACGCGAAGAGCTTGCTCTTTGGCGTCGAGTGGCGGACGGGTGAGTAACGCGTGGGAATCTACCCAGTAGTGGAGGATAGCCAGGAGAAATCCTGATTAATACTGCATACGATCTACGGATGAAAGGTGGCCTCTCCTTGGAAGCTATCGCTATTGGATGAGCCCGCGTTAGATTAGCTAGTTGGTGGGGTAATGGCCTACCAAGGCGACGATCTATAGCTGGTCTGAGAGGATGATCAGCCACATCGGGACTGAGACACGGCCCGGACTCCTACGGGAGGCAGCAGTGGGGAATATTGGACAATGGGCGCAAGCCTGATCCAGCAATGCCGCGTGTGTGA…	0	0	0	0	0	0	0	0	0.875201	0	2.91489	0	0	0	2.91489
a69fe97ce8984c14474d19c76f3919d8	64	TTGATCCTGGCTCAGAGTGAACGCTGGCGGCGTGCTTAACACATGCAAGTCGAACGAGAACGGTCCTAGCTTGCTAGGATGTCAGCTAAGTGGCGGACGGGTGAGTAATGTATAGTTAATCTACCCTTTAGAGGGGGATAACTACTGGAAACGGTAGCTAATACCCCATACTCCTTTTACCTTAATGGTAATTGGGAAATGTTTTTTCGCTAAAGGATGAGACTATATGGTATCAGGTAGTTGGTGGGGTAAGAGCCTACCAAGCCAATGACGCCTAGCTGGTCTGAGAGGATGATCAGCCACACTGGAACTGAGACACGGTCCAGACTCCTACGGGAGGCAGCAGTGGGGAATATTGCACAATGGGGGAAACCCTGATGCAGCAACGCCGCGTGGAGG…	0	0	0	0	0	0.776433	0.706103	1.80148	0	0	0	0	0	0	1.80148
fffcb30329f2874a963b63c6bc2e2f47	65	TTGATCCTGGCTCAGGATGAACGCTAGCGGCAGGCTTAACACATGCAAGTCGAGGGGTAACAGGGGAGCTTGCTTCTGCTGACGACCGGCGCACGGGTGCGTAACGCGTATAGAATCTACCTTGTACTAAGGGATAGCCTTTGGAAACGAAGATTAATACCTTATAGTATATCGACTCGGCATCGGGATGATATTAAAGATTACGGTACAAGATGACTATGCGTTCTATTAGCTAGATGGTGTGGTAACGGCACACCATGGCAACGATAGATAGGGGCCCTGAGAGGGGGATCCCCCACACTGGTACTGAGACACGGACCAGACTCCTACGGGAGGCAGCAGTGAGGAATATTGGACAATGGAGGCAACTCTGATCCAGCCATGCCGCGTGCAGGAAGA…	0	0	0	0	0	0	0	0	1.05848	1.29647	1.68662	0	0	0	1.68662
96f1c2d5dee7ed2415d196f53e4da66e	66	TTGATCCTGGCTCAGAGTGAACGCTGGCGGCGTGCTTAACACATGCAAGTCGAACGAGAACGGTCCTAGCTTGCTAGGATGTCAGCTAAGTGGCGGACGGGTGAGTAATGTATAGTTAATCTGCCCTTCAGAGGGGGATAACTACTGGAAACGGTAGCTAATACCCCATATACCTTCTTTCTTAATGAAAGTTGGGAAATGTCTTTTCGCTGAAGGATGAGACTATATGGTATCAGGTAGTTGGTGGGGTAAGAGCCCACCAAGCCTATGACGCCTAGCTGGTCTGAGAGGATGATCAGCCACACTGGAACTGAGACACGGTCCAGACTCCTACGGGAGGCAGCAGTGGGGAATATTGCACAATGGAGGAAACTCTGATGCAGCAACGCCGCGTGGAGG…	0	0	1.88723	0.975784	0.758136	0	0	0	0	0	0	0.000588469	0	0	1.88723
77fb02e564fe309c713b129497b630d8	67	TTGATCCTGGCTCAGAACGAACGCTGGCGGCAGGCCTAACACATGCAAGTCGAGCGAGACCTTCGGGTCTAGCGGCGGACGGGTTAGTAACGCGTGGGAACGTGCCCTTCTCTGCGGAATAGCCACTGGAAACGGTGAGTAATACCGCATACGCCCTTCGGGGGAAAGATTTATCGGAGAAGGATCGGCCCGCGTTAGATTAGATAGTTGGTGGGGTAATGGCCTACCAAGTCTACGATCTATAGCTGGTTTTAGAGGATGATCAGCAACACTGGGACTGAGACACGGCCCAGACTCCTACGGGAGGCAGCAGTGGGGAATCTTAGACAATGGGCGCAAGCCTGATCTAGCCATGCCGCGTGTGTGATGAAGGTCTTAGGATCGTAAAGCACTTTCGCC…	0	0	0	0	0	0	0	0	1.74643	1.74916	0.586956	0	0	0	1.74916
d8e0fb2338325f1d992e19f5eea41516	68	TTGATCCTGGCTCAGGATGAACGCTAGCGGCAGGCTTAACACATGCAAGTCGAGGGGTATAATTTAGCTTGCTAAATTAGAGACCGGCGCACGGGTGCGTAACGCGTATACAATCTACCTTACACTGGAGGATAGCCCAGAGAAATTTGGATTAATACTCCATAGTATTATTTAGTTGCATGATTGAATAATTAAAGATTTATTGGTGTAAGATGAGTATGCGTCCAATTAGCTAGATGGTGAGGTAACGGCTCACCATGGCGATGATTGGTAGGGGGCCTGAGAGGGTGAACCCCCACACTGGTACTGAGACACGGACCAGACTCCTACGGGAGGCAGCAGTGAGGAATATTGGGCAATGGATGAGAGTCTGACCCAGCCATGCCGCGTGCAGGAAGA…	0	0	0	0	0	0	0	0	1.3168	1.32758	1.17452	0	0	0	1.32758
16752813cdb0a3b2ad7637b22683b066	69	TTGATCCTGGCTCAGAGTGAACGCTGGCGGCGTGCTTAACACATGCAAGTCGAACGAGAACGGTCCTAGCTTGCTAGGATGTCAGCTAAGTGGCGGACGGGTGAGTAATGTATAGTTAATCTGCCCTTTAGAGGGGGATAACAGTTAGAAATGACTGCTAATACCCCATACTCCTTTTACCTTAATGGTAATTGGGAAATGTTTTTTCGCTAAAGGATGAGACTATATGGTATCAGGTAGTTGGTGGGGTAAGAGCCTACCAAGCCAATGACACCTAGCTGGTCTGAGAGGATGATCAGCCACACTGGAACTGAGACACGGTCCAGACTCCTACGGGAGGCAGCAGTGGGGAATATTGCACAATGGGGGAAACCCTGATGCAGCAACGCCGCGTGGAGG…	0.015319	0.0443724	0.0177521	0.0347377	0	0	0	0	0	0	0	0.630114	1.75186	0.451831	1.75186
0a407fcbf7414a1dd205ffd7e9baf694	70	TTGATCCTGGCTCAGAGTGAACGCTGGCGGCGTGCTTAACACATGCAAGTCGAACGGAAACAGCAGTGCTTGCACTGGCTGTCGAGTGGCGAACGGGTGAGTAATGTATAGTTGATTTGCCTCTAGGATAGGGATAGCCATTGGAAACGATGATTAATACCTAATATACCTTATTTAGTAAATAAGTAAGGGAAATGCTTTTGTGCCTAGAGATAAGACTATATGGTATCAGGTAGTTGGTGGGGTAAGAGCCTACCAAGCCAATGACGCCTAGCTGGTCTGAGAGGATGATCAGCCACACTGGAACTGAGACACGGTCCAGACTCCTACGGGAGGCAGCAGTGGGGAATATTGCACAATGGAGGGAACTCTGATGCAGCAACGCCGCGTGGAGGATGA…	0	0	0	0	0	0.687764	1.13656	1.03969	0	0.00140457	0	0	0	0	1.13656
cafaa8c27886003ade83b6fe07c1c3ce	71	TTGATCCTGGCTCAGAGTGAACGCTGGCGGCGTGCTTAACACATGCAAGTCGAACGGTAACAGATAGTACTTGTACTATGCTGACGAGTGGCGAACGGGTGAGTAATGTATAGTTAATTTGCCTCTAGGATAGGGATAGCCATTGGAAACGATGATTAATACCTAATACACCTTGCTTAGTAAATAAGTAAGGGAAATGCTTTCGTGCCTAGAGATAAGACTATATGGTATCAGGTAGTTGGTGGGGTAAGAGCCTACCAAGCCAATGACGCCTAGCTGGTCTGAGAGGATGATCAGCCACACTGGAACTGAGACACGGTCCAGACTCCTACGGGAGGCAGCAGTGGGGAATATTGCACAATGGAGGAAACTCTGATGCAGCAACGCCGCGTGGAGGAT…	0	0	0	0	0	1.61779	0.58654	0.790065	0	0.000572232	0	0	0	0	1.61779
bdee17c0f805d9943b8c6620bb3eed06	72	TTGATCCTGGCTCAGATTGAACGCTGGCGGCATGCTTAACACATGCAAGTCGAACGGTAACGATAGGTACTTGTACCTAGGCGACGAGTGGCGGACGGGTGAGTAACGCGTGGGAATCTACCCAGTAGTGGAGGATAGCCCAGAGAAATTTGGATTAATACTGCATGTGATCTACGGATGAAAGGTGGCCTCTCCTTGGAAGCTATCGCTATTGGATGAGCCCGCGTTAGATTAGCTAGTTGGTGGGGTAAGAGCCTACCAAGGCGACGATCTATAGCTGGTCTGAGAGGACGACCAGCCACATCGGGACTGAGACACGGCCCGGACTCCTACGGGAGGCAGCAGTGGGGAATATTGGACAATGGGCGCAAGCCTGATCCAGCAATGCCGCGTGTGTGA…	0	0	1.17639	1.15066	1.00462	0	0	0	0	0	0	0	0	0	1.17639
15738bca3fe5ce9f245167ea68667e66	73	TTGATCCTGGCTCAGAGTGAACGCTGGCGGCGTGCTTAACACATGCAAGTCGAACGAGAACGGTACTAGCTTGCTAGTATGTCAGCTAAGTGGCGGACGGGTGAGTAATGTATAGTTAATCTGCCCTTCAGAGAGGGATAACTACTGGAAACGGTAGCTAATACCTCATATACCTTTTTCTGTAAAAGAAATTGGGAAATGTTTTTTCGCTGAAGGATGAGACTATATGGTATCAGGTAGTTGGTGGGGTAAGAGCCTACCAAGCCAATGACACCTAGCTGGTCTGAGAGGATGATCAGCCACACTGGAACTGAGACACGGTCCAGACTCCTACGGGAGGCAGCAGTGGGGAATATTGCACAATGGAGGAAACTCTGATGCAGCAACGCCGCGTGGAGG…	0.703417	0.324529	1.47964	0.752334	0.342499	0	0.000555737	0	0	0	0	0	0.00297132	0.00261769	1.47964
f2f5c0c85fdb6c43f5cd79b4aab36859	74	TTGATCCTGGCTCAGAGTGAACGCTGGCGGCGTGCTTAACACATGCAAGTCGAACGGTAACAGCAGTACTTGTACTGGCTGACGAGTGGCGAACGGGTGAGTAAAGTATAGTTGATTTGCCTTTAGGATAGGGATAGCCATTGGAAACGATGATTAATACCTAATATACCTTACTTAGTAAATAAGTAAGGGAAATGCTTTCGTGCCTAAAGATAAGACTATATGGTATCAGGTAGTTGGTGGGGTAAGAGCCTACCAAGCCGATGACGCCTAGCTGGTCTGAGAGGATGATCAGCCACACTGGAACTGAGACACGGTCCAGACTCCTACGGGAGGCAGCAGTGGGGAATATTGCACAATGGAGGAAACTCTGATGCAGCAACGCCGCGTGGAGGATGA…	0.0207052	0	0	0	0	0	0	0	0	0	0	0.785062	0.906934	1.033	1.033
306abb675c42497a1f02615cb4c6e55a	75	TTGATCCTGGCTCAGAGTGAACGCTGGCGGCGTGCTTAACACATGCAAGTCGAACGGTAGCAGCAGTTTTCGGACTGGCTGACGAGTGGCGAACGGGTGAGTAAAGTATAGTTAATTTGCCTTTAGGATAGGGATAGCCATTGGAAACGATGATTAATACCTAATATACCTTATTTAGTAAATAAGTAAGGGAAATGCTTTTGTGCCTAAAGATAAGACTATATGGTATCAGGTAGTTGGTGGGGTAAGAGCCTACCAAGCCAATGACGCCTAGCTGGTCTGAGAGGATGATCAGCCACACTGGAACTGAGACACGGTCCAGACTCCTACGGGAGGCAGCAGTGGGGAATATTGCACAATGGAGGGAACTCTGATGCAGCAACGCCGCGTGGAGGATGA…	0	0	0	0	0	0.598911	1.00965	1.03166	0	0	0	0	0	0	1.03166
3191ec7e9f95be10aac2b54e75956402	76	TTGATCCTGGCTCAGGGTGAACGCTAGCGGTGCGCCTAACACATGCAAGTCGAGCGAGAAAGTTTCTAGCTTGCTAGAAACCGGAAAGCGGCGAACGGGTGAGTAACACGTTGGTATCTGCCCCCAAGTCAGGGATAGCCATTGGAAACGATGATTAATACCGGATAGTCTCTTCGGAGTAAAGATTTATTGCTTGGGGAGGAACCTGCGGTCTATCAGCTAGTTGGTGAGGTAAAAGCTCACCAAGGCAATGACGGATACCTGGTCTGAGAGGATGATCAGGCACAATGGAACTGAGACACGGTCCATACTCCTACGGGAGGCAGCAGTGAGGAATCTTCCACAATGGACGAAAGTCTGATGGAGCGACACCGCGTGAAGGATGACGGCCTAACGGTT…	0	0	1.26111	1.21383	0.638981	0	0	0	0	0	0	0	0	0	1.26111
81b1289acde88f71960cbc27b596c12b	77	TTGATCCTGGCTCAGAGTGAACGCTGGCGGCGTGCTTAACACATGCAAGTCGAACGAGAACGGGTCTAGCTTGCTAGACTGTCAGCTAAGTGGCGGACGGGTGAGTAATGTATAGTTAATCTGCCCCCTAGAGAGGGATAACTACTGGAAACGGTAGCTAATACCTCATACTCCTTCTTTTTTAATAAAAGTTGGGAAATGTTTTTTCGCTAGGGGATGAGACTATATGGTATCAGGTAGTTGGTGGGGTAAGAGCCTACCAAGCCAATGACACCTAGCTGGTCTGAGAGGATGATCAGCCACACTGGAACTGAGACACGGTCCAGACTCCTACGGGAGGCAGCAGTGGGGAATATTGCACAATGGGGGAAACCCTGATGCAGCAACGCCGCGTGGAGG…	0	0	0	0	0	0.502463	1.13759	0.935088	0	0.00109244	0	0	0	0	1.13759
9ceabb9681cdae2993a922fec657d39e	78	TTGATCCTGGCTCAGAGTGAACGCTGGCGGCGTGCTTAACACATGCAAGTCGAACGAGAACGGTACTAGCTTGCTAGTATGTCAGCTAAGTGGCGGACGGGTGAGTAATGTATAGTTAATCTGCCCTTTAGAGGGGGATAACTACTGGAAACGGTAGCTAATACCCCATACTCCTTTTACCTTAATGGTAATTGGGAAATGTTTTTTCGCTAAAGGATGAGACTATATGGTATCAGGTAGTTGGTAGGGTAAGAGCCTACCAAGCCAATGACGCCTAGCTGGTCTGAGAGGATGATCAGCCACACTGGAACTGAGACACGGTCCAGACTCCTACGGGAGGCAGCAGTGGGGAATATTGCACAATGGGGGAAACCCTGATGCAGCAACGCCGCGTGGAGG…	0	0.0217979	0.00602812	0	0.00397632	0	0	0	0	0	0	0.727709	1.08453	0.78814	1.08453
9edfcf5f59ee58155f36623d317db6b7	79	TTGATCCTGGCTCAGATTGAACGCTGGCGGCATGCTTAACACATGCAAGTCGAACGGAAACGCGAAGAGCTTGCTCTTTGGCGTCGAGTGGCGGACGGGTGAGTAACGCGTGGGAATCTACTCAGTAGTGGGGGATAGCCAGGAGAAATTCTGATTAATACCGCATACGATCTACGGATGAAAGGTGGCCTCTACATGTAAGCTATCGCTATTGAATGAGCCCGCGTTAGATTAGCTAGTTGGTGGGGTAAAGGCCTACCAAGGCGACGATCTATAGCTGGTCTGAGAGGACGACCAGCCACATCGGGACTGAGACACGGCCCGGACTCCTACGGGAGGCAGCAGTGGGGAATATTGGACAATGGGCGCAAGCCTGATCCAGCAATGCCGCGTGTGTGA…	0	0.000110931	0	0	0	0	0	0	0	0	0	0.807967	1.17636	0.606489	1.17636
13fa7e9a170fe50f98ed4f0f9f588469	80	TTGATCCTGGCTCAGAGTGAACGCTGGCGGCGTGCTTAACACATGCAAGTCGAACGAGAACGGTACTAGCTTGCTAGTATGTCAGCTAAGTGGCGGACGGGTGAGTAATGTATAGTTAATCTGCCTTCTAGAGAGGGATAACTACTGGAAACGGTAGCTAATACCTCATACTCCTTCTTTCTTACATGAGAGTTGGGAAATGTTTTTTCGCTAGAAGATGAGACTATATGGTATCAGGTAGTTGGTGGGGTAAGAGCCCACCAAGCCAATGACGCCTAGCTGGTCTGAGAGGATGATCAGCCACACTGGAACTGAGACACGGTCCAGACTCCTACGGGAGGCAGCAGTGGGGAATATTGCACAATGGAGGAAACTCTGATGCAGCAACGCCGCGTGGAG…	1.4523	2.34763	0	0	0	0	0	0	0	0	0	0	0	0	2.34763
4c97a6753f5e72b723c7953662c59bb3	81	TTGATCCTGGCTCAGGATGAACGCTAGCGGCAGGCCTAACACATGCAAGTCGAACGGTAACAGCAGAGCTTGCTCTGGCTGACGAGTGGCGCACGGGTGCGTAACGCGTATACAATCTGCCTATTACTGGGGTATAGCCCGAAGAAATTTGGATTAACCCCCCATAGTATTGAGATAAGGCATCTTATTTCAATTAAAACCACGGTGGTAATAGATGAGTATGCGTCCTATTAGTTTGTTGGTAAGGTAACGGCTTACCAAGACTTCGATAGGTAGGGGTCCTGAGAGGGAGATCCCCCACACTGGTACTGAGACACGGACCAGACTCCTACGGGAGGCAGCAGTGAGGAATATTGGACAATGGAGGCAACTCTGATCCAGCCATGCCGCGTGCAGGAA…	0	0	0	0	0	0	0	0	1.01177	1.28383	0.830557	0	0	0	1.28383
4f9a8c2d4c995cdd1d544454c354333b	82	TTGATCCTGGCTCAGATTGAACGCTGGCGGCATGCTTAACACATGCAAGTCGAACGGAAACGCGAAGAGCTTGCTCTTTGGCGTCGAGTGGCGGACGGGTGAGTAACGCGTGGGAATCTACCCAGTAGTGGGGGATAGCCAGGAGAAATCCTGATTAATACCGCATACGATCTACGGATGAAAGGTGGCCACTCCTTGGAAGCTATCGCTATTGGATGAGCCCGCGTTAGATTAGCTAGTTGGTGGGGTAAAGGCCTACCAAGGCGACGATCTATAGCTGGTCTGAGAGGACGACCAGCCACATCGGGACTGAGACACGGCCCGGACTCCTACGGGAGGCAGCAGTGGGGAATATTGGACAATGGGCGCAAGCCTGATCCAGCAATGCCGCGTGTGTGA…	0	0	0.835821	1.00337	1.03742	0	0	0	0	0	0	0	0	0	1.03742
544404b592ef35ac5d0b1d79c11c7439	83	TTGATCCTGGCTCAGGATGAACGCTAGCGGGAGGCTTAATACATGCAAGTCGAACGGTAATCCCCAACTTGTTGGGGAACGAGTGGCGCACGGGTGAGTAACGCGTACACGATCTACCATTTGGTACGGGATAGCCCTGGGAAACTGGGATTAATACCGTATAGTATTGTAGTTTTTAGAATATTACAATTAAAGAATTTCGCCAAATGATGAGTGTGCGTCCTATTAGCTAGTTGGTAAGGTAACGGCTTACCAAGGCGATGATAGGTAGGGGGCGTGAGAGCGTGATCCCCCACACGGGTACTGAGACACGGACCCGACTCCTACGGGAGGCAGCAGTAAGGAATATTGGACAATGGGGGCAACCCTGATCCAGCCATCCCGCGTGAAGGATGAAGG…	0	0	0	0	0	0.411231	1.23568	0.661725	0	0.00130053	0	0.00624682	0.0661567	0.0082822	1.23568
915c05bc64a4431c55e0167ffd3197a4	84	TTGATCCTGGCTCAGAACGAACGCTGGCGGCAGGCCTAACACATGCAAGTCGAGCGCACCCTTCGGGGCGAGCGGCGGACGGGTTAGTAACGCGTGGGAATATGCCCTTCACTATGGAATAGCCTCGGGAAACTGAGAGTAATACCATATACGCCCTTCGGGGGAAAGATTTATCGGTGAAGGATTAGCCCGCGTTAGATTAGATAGTTGGTGGGGTAATGGCCTACCAAGTCTACGATCTATAGCTGGTTTTAGAGGATGATCAGCAACACTGGGACTGAGACACGGCCCAGACTCCTACGGGAGGCAGCAGTGGGGAATCTTAGACAATGGGCGCAAGCCTGATCTAGCCATGCCGCGTGTGTGATGAAGGCCCTAGGGTCGTAAAGCACTTTCGCC…	0	0	0	0	0	0	0	0	1.77562	0.326848	0.960907	0	0	0	1.77562
b48974c487bdc7f86d4b06046eda9576	85	TTGATCCTGGCTCAGAGTGAACGCTGGCGGCGTGCTTAACACATGCAAGTCGAACGAGAACGGTACTAGCTTGCTAGTATGTCAGCTAAGTGGCGGACGGGTGAGTAATGTATAGTTAATCTGCCCTTTAGAGGGGGATAACTACTGGAAACGGTAGCTAATACCCCATACTCCTTTTACCTTAATGGTAATTGGGAAATGTTTTTTCGCTAAAGGATGAGACTATATGGTATCAGGTAGTTGGTGGGGTAAGAGCCTACCAAGCCAATGACACCTAGCTGGTCTGAGAGGATGATCAGCCACACTGGAACTGAGACACGGTCCAGACTCCTACGGGAGGCAGCAGTGGGGAATATTGCACAATGGAGGAAACTCTGATGCAGCAACGCCGCGTGGAGG…	0	0	1.34764	1.00853	0.428995	0.000320273	0.000476346	0.000436159	0	0	0	0	0	0	1.34764
84bc0e4e15e71b015e1763681343c9d5	86	TTGATCCTGGCTCAGAACGAACGCTGGCGGCAGGCTTAACACATGCAAGTCGAGCGAGAACTTCGGTTCTAGCGGCGGACGGGTGAGTAACACGTGGGAACATGCCAATCACTACGGAATAGTCCCGGGAAACTGGGTTTAATACCGTATACGCCCTTCGGGGGAAAGAATTTCGGTGATTGATTGGCCCGCGCTTGATTAGATAGTTGGTGGGGTAATGGCCTACCAAGTCTACGATCAATAGCTGGTTTGAGAGGATGATCAGCCACACTGGGACTGAGACACGGCCCAGACTCCTACGGGAGGCAGCAGTGAGGAATATTGGACAATGGGGGAAACCCTGATCCAGCCATGCCGCGTGAGTGATGAAGGCCTTAGGGTCGTAAAGCTCTTTCGCTA…	0	0	0	0	0	0	0	0	0.653828	0.893826	1.23979	0	0	0	1.23979
6a6a73ac3b7a0d7c7346c62f8bc963fb	87	TTGATCCTGGCTCAGAGTGAACGCTGGCGGCGTGCTTAACACATGCAAGTCGAACGGAAACAACAATCTTCGGATTGGGTGTCGAGTGGCGAACGGGTGAGTAATGTATAGTTAATTTGCCTCTTGGAGAGGGATAGCCATTGGAAACGATGATTAATACCTCATACTCCTTATGTAGTAAATATATAAGGGAAATGCTTTTGTGCCAAGAGATAAGACTATATCCTATCAGCTTGTTGGTAGTGTAAGAGACTACCAAGGCTATGACGGGTAGCTGGTTTGAGAGGATGATCAGCCACACTGGAACTGAGACACGGTCCAGACTCCTACGGGAGGCAGCAGTGGGGAATATTGCACAATGGAGGAAACTCTGATGCAGCAACGCCGCGTGGAGGATGA…	0	0	0	0	0	1.73908	0.692448	0.0797807	0	0.00213286	0	0	0	0	1.73908
a0f75e2aecdd8293787eb9919114d887	88	TTGATCCTGGCTCAGAGTGAACGCTGGCGGCGTGCTTAACACATGCAAGTCGAACGGTAGCAGCAGTACTTGTACTGGCTGACGAGTGGCGAACGGGTGAGTAAAGTATAGTTAATTTGCCTCTAGGAGAGGGATAGCCATTGGAAACGATGATTAATACCTCATATACCTTATTTAGTAAATAAGTAAGGGAAATGCTTTTGTGCCTAGAGATAAGACTATATGGTATCAGGTAGTTGGTGGGGTAAGAGCCTACCAAGCCGATGACGCCTAGCTGGTCTGAGAGGATGATCAGCCACACTGGAACTGAGACACGGTCCAGACTCCTACGGGAGGCAGCAGTGGGGAATATTGCACAATGGAGGGAACTCTGATGCAGCAACGCCGCGTGGAGGATGA…	0	0	0.713027	0.793896	1.1089	0	0	0	0	0	0	0	0	0	1.1089
9857d7894d0b6b9ee0d36b939867e4c7	89	TTGATCCTGGCTCAGATTGAACGCTGGCGGCATGCTTAACACATGCAAGTCGAACGGAAACGCGAAGAGCTTGCTCTTTGGCGTCGAGTGGCGGACGGGTGAGTAACGCGTGGGAATCTACTCAGTAGTGGGGGATAGCCAGGAGAAATCCTGATTAATACCGCATACGATCTACGGATGAAAGGTGGCCTCTACATGTAAGCTATCGCTATTGAATGAGCCCGCGTTAGATTAGCTAGTTGGTAGGGTAAAGGCCTACCAAGGCGACGATCTATAGCTGGTCTGAGAGGACGACCAGCCACATCGGGACTGAGACACGGCCCGGACTCCTACGGGAGGCAGCAGTGGGGAATATTGGACAATGGGCGCAAGCCTGATCCAGCAATGCCGCGTGTGTGA…	0	0	0.683646	0.904507	1.01316	0	0	0	0	0	0	0	0	0	1.01316
29250362bd6556302bbd8e9e17d5990f	90	TTGATCCTGGCTCAGAACGAACGCTGGCGGCAGGCCTAATACATGCAAGTCGAGCGCGCCCTTCGGGGTGAGCGGCGGACGGGTGAGTAACGCGTGGGAATATGCCCTTCTCTAAGGAATAGCCTCTGGAAACGGAGAGTAATACCTTATACGCCCTTTGGGGGAAAGATTTATCGGAGAAGGATTAGCCCGCGTTAGATTAGGTAGTTGGTGGGGTAATGGCCTACCAAGCCTACGATCTATAGCTGGTTTGAGAGGATGATCAGCCACACTGGGACTGAGACACGGCCCAGACTCCTACGGGAGGCAGCAGTAGGGAATCTTAGACAATGGGGGCAACCCTGATCTAGCCATGCCGCGTGTGTGATGAAGGCCCTAGGGTCGTAAAGCACTTTCGCC…	0	0	0	0	0	0	0	0	1.33143	1.10347	0.51105	0	0	0	1.33143
efbe328feb204d867e284dfbc235919d	91	TTGATCCTGGCTCAGGATGAACGCTAGCGGCAGGCTTAACACATGCAAGTCGAGGGGTATAATATAGCTTGCTATATTAGAGACCGGCGCACGGGTGCGTAACGCGTATACAATCTACCTTACACTGGAGGATAGCCCAGAGAAATTTGGATTAATACTCCATAGTATTATTTAGTTGCATGATTGAATAATTAAAGATTTATTGGTGTAAGATGAGTATGCGTCCAATTAGCTAGATGGTAAGGTAACGGCTTACCATGGCGATGATTGGTAGGGGGCCTGAGAGGGTGAACCCCCACACTGGTACTGAGACACGGACCAGACTCCTACGGGAGGCAGCAGTGAGGAATATTGGGCAATGGATGAGAGTCTGACCCAGCCATGCCGCGTGCAGGAAGA…	0	0	0	0	0	0	0	0	0.50751	1.5212	0.593018	0	0	0	1.5212
cc53c8c22e8699ff651c740ce40524f5	92	TTGATCCTGGCTCAGATTGAACGCTGGCGGCATGCTTAACACATGCAAGTCGAACGGAAACGCGAAGAGCTTGCTCTTTGGCGTCGAGTGGCGGACGGGTGAGTAACGCGTGGGAATCTACCCAGTAGTGGAGGATAGCCCAGAGAAATTTGGATTAATACTGCATACGATCTACGGATGAAAGGTGGCCTCTCCTTGGAAGCTATCGCTATTGGATGAGCCCGCGTAAGATTAGCTAGTTGGTGGGGTAATGGCCTACCAAGGCGACGATCTTTAGCTGGTCTGAGAGGATGATCAGCCACATCGGGACTGAGACACGGCCCGGACTCCTACGGGAGGCAGCAGTGGGGAATATTGGACAATGGGCGCAAGCCTGATCCAGCAATGCCGCGTGTGTGA…	0	0	0	0	0	0	0	0	0.410064	0.190761	1.64086	0	0	0	1.64086
b2b8febf1510c0a02241c5e73259fd65	93	TTGATCCTGGCTCAGAGTGAACGCTGGCGGCGTGCTTAACACATGCAAGTCGAACGAGAACGGTCCTAGCTTGCTAGGATGTCAGCTAAGTGGCGGACGGGTGAGTAATGTATAGTTAATCTGCCCTTCAGAGAGGGATAACAGTTAGAAATGACTGCTAATACCTCATATACCTTCTACCTTAATGGTAGTTGGGAAATGTCTTTTCGCTGAAGGATGAGACTATATGGTATCAGGTAGTTGGTGGGGTAAGAGCCTACCAAGCCTATGACACCTAGCTGGTCTGAGAGGATGATCAGCCACACTGGAACTGAGACACGGTCCAGACTCCTACGGGAGGCAGCAGTGGGGAATATTGCACAATGGGCGAAAGCCTGATGCAGCAACGCCGCGTGGAGG…	1.97665	1.07281	0	0	0	0	0	0	0	0	0	0	0	0	1.97665
04264e0fb55bec9bc0430729dba3b260	94	TTGATCCTGGCTCAGAACGAACGCTGGCGGCAGGCTTAACACATGCAAGTCGAACGAGAAGCTCACTTCGGTGAGTAGACAGTGGCAGACGGGTGAGTAACGCGTGGCAACCTACCTTTTTCTACGGAACAACAGTTGGAAACGACTGCTAATACCGTATACGCCCTCCGGGGGAAAGATTTATCGGTGAAAGATGGGGCCGCGTTAGATTAGCTAGTTGGTGAGGTAATGGCTCACCAAGGCGACGATCTATAGCTGGTCTGAGAGGATGATCAGCCACACTGGGACTGAGACACGGCCCAGACTCCTACGGGAGGCAGCAGTGGGGAATATTGGACAATGGGGGCAACCCTGATCCAGCCATGCCGCGTGAATGATGAAGGCCTTAGGGTTGTAAAA…	0	0	0	0	0	0	0	0	0.882725	0.112418	1.16166	0	0	0	1.16166
68f216abf76d50ace03b0fae661456a0	95	TTGATCCTGGCTCAGAGTGAACGCTGGCGGCGTGCTTAACACATGCAAGTCGAACGGAAACAACAATCTTCGGATTGGGTGTCGAGTGGCGAACGGGTGAGTAATGTATAGTTAATTTGCCTCTTGGAGAGGGATAGCCATTGGAAACGATGATTAATACCTCATACTCCTTATCTAGTAAATAGATAAGGGAAATGCTTTTGTGCCAAGAGATAAGACTATATCCTATCAGCTTGTTGGTAGTGTAAGAGACTACCAAGGCTATGACGGGTAGCTGGTTTGAGAGGATGATCAGCCACACTGGAACTGAGACACGGTCCAGACTCCTACGGGAGGCAGCAGTGGGGAATATTGCACAATGGAGGAAACTCTGATGCAGCAACGCCGCGTGGAGGATGA…	0.0751962	0.0865262	0	0	0	0	0	0	0	0	0	0.200668	0.364685	1.10651	1.10651
184b8c073b001cfaea48e7748a140d99	96	TTGATCCTGGCTCAGATTGAACGCTGGAGGTATGCTTAACACATGCAAGTCGAACGCGAAAGTTTCTTCGGAAACAAGTAGAGTGGCGGACGGGTGAGTAACGCGTAGGAATATACCTAGTAGTGGGGGATAACATGGAGAAATTCATGCTAATACCGCATATGTCCCATGGGATAAAGAGGGCCTCTTCTTGAAAGCTCTTGCTATTAGATTAGCCTGCGTCGGATTAGCTTGTTGGTGGGGTAATGGCCCACCAAGGCGACGATCCGTAGCTGGTCTGAGAGGATGATCAGCCACACTGGGACTGAGACACGGCCCAGACTCCTACGGGAGGCAGCAGTGGGGAATATTGGACAATGGGGGCAACCCTGATCCAGCAATACCTCGTGTGTGAAGAAG…	0	0	0	0	0	0	0	0	0.218304	0.027207	1.44504	0	0	0	1.44504
47c305f30898d34ba57e567f2adcd10a	97	TTGATCCTGGCTCAGGATGAACGCTAGCGGCAGGCTTAACACATGCAAGTCGAGGGGTAACATTGATTGCTTGCAATCAGATGACGACCGGCGCACGGGTGCGTAACGCGTATGCAACCTACCTTTTACTGGAGAATAGCCTTTAGAAATGAAGATTAATACTCCATAATATTGATATAAAGCATTTTATATTGATTAAAGTTTCGGCGGTAAAAGATGGGCATGCGTTTTATTAGTTAGTTGGTAAGGTAATGGCTTACCAAGACTACGATAAATAGGGGTCCTGAGAGGGAGATCCCCCACACTGGTACTGAGACACGGACCAGACTCCTACGGGAGGCAGCAGTGAGGAATATTGGACAATGGAGGCAACTCTGATCCAGCCATGCCGCGTGCAGG…	1.38536	0.855667	0	0	0	0	0	0	0	0	0	0	0	0	1.38536
91ce9a6796370341a79f80115c250bba	98	TTGATCCTGGCTCAGAACGAACGCTGGCGGCACGCCTAACACATGCAAGTCGAGCGCAGTCCTTCGGGACCGAGCGGCGGACGGGTTAGTAACGCGTGGGAACATACCCTTCTCTAAGGAATAGCCTCTGGAAACGGAGAGTAATACCTTATACGCCCTTCGGGGGAAAGATTTATCGGTGAAGGATTGGCCCGCGTTAGATTAGATAGTTGGTGGGGTAATGGCCTACCAAGTCTACGATCTATAGCTGGTTTGAGAGGATGATCAGCAACACTGGGACTGAGACACGGCCCAGACTCCTACGGGAGGCAGCAGTGGGGAATCTTAGACAATGGGCGAAAGCCTGATCTAGCGATGCCGCGTGTGTGACGAAGGCCTTAGGGTCGTAAAGCACTTTCG…	0	0	0	0	0	0	0	0	1.46114	0.264215	0.213126	0	0	0	1.46114
39e6461b0977a6962eb8bba69689e73f	99	TTGATCCTGGCTCAGATTGAACGCTGGCGGCATGCTTAACACATGCAAGTCGAACGGAAACGCGAAGAGCTTGCTCTTTGGCGTCGAGTGGCGGACGGGTGAGTAACGCGTGGGAATCTACCCAGTAGTGGGGGATAGCCCAGAGAAATTTGGATTAATACCGCATACGATCTACGGATGAAAGGTGGCCACTCCTTGGAAGCTATCGCTATTGGATGAGCCCGCGTTAGATTAGCTAGTTGGTGGGGTAAGAGCCTACCAAGGCAACGATCTATAGCTGGTCTGAGAGGACGACCAGCCACATCGGGACTGAGACACGGCCCGGACTCCTACGGGAGGCAGCAGTGGGGAATATTGGACAATGGGCGCAAGCCTGATCCAGCAATGCCGCGTGTGTGA…	0.813378	1.01297	0	0	0	0	0	0	0	0	0	0	0	0	1.01297

## Sheet: SM1-sheet2-SeqMatchResults
Seqmatch:version 3
RDP Data:release11_5
Data Set:both type and non-type strains
:both environmental (uncultured) sequences and isolates
:near-full-length sequences (>=1200 bases)
:good quality sequences
Comments:1558793 sequences were included in the search. The screening was based on 7-base oligomers.
Query Submit Date:Fri Mar 30 06:41:57 EDT 2018
The three best hits are provided for each variant number
Dominant variants (>10 % of the reads in at least one sample)
Variant number	short ID	S_ab score	sequence name	taxon rank	taxon name
1	S002281835	0.935	uncultured epsilon proteobacterium; bC9; FN562855	rootrank	Root	domain	Bacteria	phylum	Proteobacteria	class	Epsilonproteobacteria	order	Campylobacterales	family	Helicobacteraceae	genus	Sulfurovum
1	S002355744	0.977	epsilon proteobacterium ectosymbiont of Rimicaris exoculata; Epsilon S2-16; FN658696	rootrank	Root	domain	Bacteria	phylum	Proteobacteria	class	Epsilonproteobacteria	order	Campylobacterales	family	Helicobacteraceae	genus	Sulfurovum
1	S004435620	0.926	bacterium episymbiont of Kiwa sp.; ARB_FAF7118E; KF439002	rootrank	Root	domain	Bacteria	phylum	Proteobacteria	class	Epsilonproteobacteria	order	Campylobacterales	family	Helicobacteraceae	genus	Sulfurovum
2	S002281835	0.947	uncultured epsilon proteobacterium; bC9; FN562855	rootrank	Root	domain	Bacteria	phylum	Proteobacteria	class	Epsilonproteobacteria	order	Campylobacterales	family	Helicobacteraceae	genus	Sulfurovum
2	S002355744	0.939	epsilon proteobacterium ectosymbiont of Rimicaris exoculata; Epsilon S2-16; FN658696	rootrank	Root	domain	Bacteria	phylum	Proteobacteria	class	Epsilonproteobacteria	order	Campylobacterales	family	Helicobacteraceae	genus	Sulfurovum
2	S003230824	0.937	uncultured bacterium; RESET_28B06; JN874234	rootrank	Root	domain	Bacteria	phylum	Proteobacteria	class	Epsilonproteobacteria	order	Campylobacterales	family	Helicobacteraceae	genus	Sulfurovum
3	S000622064	0.952	uncultured bacterium; LC1228B-116; DQ270653	rootrank	Root	domain	Bacteria	phylum	Proteobacteria	class	Epsilonproteobacteria	order	Campylobacterales	family	Helicobacteraceae	genus	Sulfurovum
3	S003230700	0.952	uncultured bacterium; RESET_18B11; JN874110	rootrank	Root	domain	Bacteria	phylum	Proteobacteria	class	Epsilonproteobacteria	order	Campylobacterales	family	Helicobacteraceae	genus	Sulfurovum
3	S003230701	0.952	uncultured bacterium; RESET_18B12; JN874111	rootrank	Root	domain	Bacteria	phylum	Proteobacteria	class	Epsilonproteobacteria	order	Campylobacterales	family	Helicobacteraceae	genus	Sulfurovum
4	S002281835	0.933	uncultured epsilon proteobacterium; bC9; FN562855	rootrank	Root	domain	Bacteria	phylum	Proteobacteria	class	Epsilonproteobacteria	order	Campylobacterales	family	Helicobacteraceae	genus	Sulfurovum
4	S002355744	0.947	epsilon proteobacterium ectosymbiont of Rimicaris exoculata; Epsilon S2-16; FN658696	rootrank	Root	domain	Bacteria	phylum	Proteobacteria	class	Epsilonproteobacteria	order	Campylobacterales	family	Helicobacteraceae	genus	Sulfurovum
4	S003230824	0.92	uncultured bacterium; RESET_28B06; JN874234	rootrank	Root	domain	Bacteria	phylum	Proteobacteria	class	Epsilonproteobacteria	order	Campylobacterales	family	Helicobacteraceae	genus	Sulfurovum
5	S000861380	0.9	uncultured prokaryote; IIB112; AM268719	rootrank	Root	domain	Bacteria	phylum	Proteobacteria	class	Epsilonproteobacteria	order	Campylobacterales	family	Helicobacteraceae	genus	Sulfurovum
5	S001418551	0.885	epsilon proteobacterium ectosymbiont of Rimicaris exoculata; LOG_283/7-2_C6; FM203391	rootrank	Root	domain	Bacteria	phylum	Proteobacteria	class	Epsilonproteobacteria	order	Campylobacterales	family	Helicobacteraceae	genus	Sulfurovum
5	S002281824	0.9	uncultured epsilon proteobacterium; aH7; FN562844	rootrank	Root	domain	Bacteria	phylum	Proteobacteria	class	Epsilonproteobacteria	order	Campylobacterales	family	Helicobacteraceae	genus	Sulfurovum
6	S000147911	0.945	uncultured epsilon proteobacterium; 11; AJ515717	rootrank	Root	domain	Bacteria	phylum	Proteobacteria	class	Epsilonproteobacteria	order	Campylobacterales	family	Helicobacteraceae	genus	Sulfurovum
6	S000403081	0.964	uncultured epsilon proteobacterium; AT-pp46; AY225621	rootrank	Root	domain	Bacteria	phylum	Proteobacteria	class	Epsilonproteobacteria	order	Campylobacterales	family	Helicobacteraceae	genus	Sulfurovum
6	S004506178	0.954	uncultured bacterium; HL-WM_bac4; HG738984	rootrank	Root	domain	Bacteria	phylum	Proteobacteria	class	Epsilonproteobacteria	order	Campylobacterales	family	Helicobacteraceae	genus	Sulfurovum
7	S000861380	0.9	uncultured prokaryote; IIB112; AM268719	rootrank	Root	domain	Bacteria	phylum	Proteobacteria	class	Epsilonproteobacteria	order	Campylobacterales	family	Helicobacteraceae	genus	Sulfurovum
7	S001418551	0.888	epsilon proteobacterium ectosymbiont of Rimicaris exoculata; LOG_283/7-2_C6; FM203391	rootrank	Root	domain	Bacteria	phylum	Proteobacteria	class	Epsilonproteobacteria	order	Campylobacterales	family	Helicobacteraceae	genus	Sulfurovum
7	S002281824	0.9	uncultured epsilon proteobacterium; aH7; FN562844	rootrank	Root	domain	Bacteria	phylum	Proteobacteria	class	Epsilonproteobacteria	order	Campylobacterales	family	Helicobacteraceae	genus	Sulfurovum
8	S000861380	0.945	uncultured prokaryote; IIB112; AM268719	rootrank	Root	domain	Bacteria	phylum	Proteobacteria	class	Epsilonproteobacteria	order	Campylobacterales	family	Helicobacteraceae	genus	Sulfurovum
8	S001418551	0.93	epsilon proteobacterium ectosymbiont of Rimicaris exoculata; LOG_283/7-2_C6; FM203391	rootrank	Root	domain	Bacteria	phylum	Proteobacteria	class	Epsilonproteobacteria	order	Campylobacterales	family	Helicobacteraceae	genus	Sulfurovum
8	S002281824	0.945	uncultured epsilon proteobacterium; aH7; FN562844	rootrank	Root	domain	Bacteria	phylum	Proteobacteria	class	Epsilonproteobacteria	order	Campylobacterales	family	Helicobacteraceae	genus	Sulfurovum
9	S001318082	0.912	uncultured bacterium; Ba9; FJ640825	rootrank	Root	domain	Bacteria	phylum	Proteobacteria	class	Gammaproteobacteria	order	Gammaproteobacteria_incertae_sedis	genus	Cocleimonas
9	S001337723	0.942	uncultured bacterium; SGXT601; FJ792012	rootrank	Root	domain	Bacteria	phylum	Proteobacteria	class	Gammaproteobacteria	order	Gammaproteobacteria_incertae_sedis	genus	Cocleimonas
9	S004435636	0.914	bacterium episymbiont of Kiwa sp.; ARB_B1C4EAF5; KF439018	rootrank	Root	domain	Bacteria	phylum	Proteobacteria	class	Gammaproteobacteria	order	Gammaproteobacteria_incertae_sedis	genus	Cocleimonas
10	S000514492	1	Bathymodiolus azoricus thioautotrophic gill symbiont; AY951931	rootrank	Root	domain	Bacteria	phylum	Proteobacteria	class	Gammaproteobacteria		unclassified_Gammaproteobacteria
10	S000623777	0.978	thiotrophic endosymbiont of Bathymodiolus azoricus (Menez Gwen); aMG-10-153; AM083968	rootrank	Root	domain	Bacteria	phylum	Proteobacteria	class	Gammaproteobacteria		unclassified_Gammaproteobacteria
10	S000623779	0.978	thiotrophic endosymbiont of Bathymodiolus azoricus (Menez Gwen); aMG-3-55; AM083970	rootrank	Root	domain	Bacteria	phylum	Proteobacteria	class	Gammaproteobacteria		unclassified_Gammaproteobacteria
Abundant variants (>1 % of the reads in at least one sample)
query name	short ID	S_ab score	sequence name	taxon rank	taxon name
11	S000147911	0.918	uncultured epsilon proteobacterium; 11; AJ515717	rootrank	Root	domain	Bacteria	phylum	Proteobacteria	class	Epsilonproteobacteria	order	Campylobacterales	family	Helicobacteraceae	genus	Sulfurovum
11	S002281835	0.947	uncultured epsilon proteobacterium; bC9; FN562855	rootrank	Root	domain	Bacteria	phylum	Proteobacteria	class	Epsilonproteobacteria	order	Campylobacterales	family	Helicobacteraceae	genus	Sulfurovum
11	S002355744	0.989	epsilon proteobacterium ectosymbiont of Rimicaris exoculata; Epsilon S2-16; FN658696	rootrank	Root	domain	Bacteria	phylum	Proteobacteria	class	Epsilonproteobacteria	order	Campylobacterales	family	Helicobacteraceae	genus	Sulfurovum
12	S001418546	0.972	gamma proteobacterium ectosymbiont of Rimicaris exoculata; LOG_283/7-2_D9; FM203386	rootrank	Root	domain	Bacteria	phylum	Proteobacteria	class	Gammaproteobacteria	order	Gammaproteobacteria_incertae_sedis	genus	Cocleimonas
12	S001575193	0.976	gamma proteobacterium ectosymbiont of Rimicaris exoculata; LOG_272/6-9_D1; FN393024	rootrank	Root	domain	Bacteria	phylum	Proteobacteria	class	Gammaproteobacteria	order	Gammaproteobacteria_incertae_sedis	genus	Cocleimonas
12	S002355747	0.978	gamma proteobacterium ectosymbiont of Rimicaris exoculata; Gamma S2-12; FN658699	rootrank	Root	domain	Bacteria	phylum	Proteobacteria	class	Gammaproteobacteria	order	Gammaproteobacteria_incertae_sedis	genus	Cocleimonas
13	S002281835	0.947	uncultured epsilon proteobacterium; bC9; FN562855	rootrank	Root	domain	Bacteria	phylum	Proteobacteria	class	Epsilonproteobacteria	order	Campylobacterales	family	Helicobacteraceae	genus	Sulfurovum
13	S002355744	0.962	epsilon proteobacterium ectosymbiont of Rimicaris exoculata; Epsilon S2-16; FN658696	rootrank	Root	domain	Bacteria	phylum	Proteobacteria	class	Epsilonproteobacteria	order	Campylobacterales	family	Helicobacteraceae	genus	Sulfurovum
13	S003230795	0.931	uncultured bacterium; RESET_28E10; JN874205	rootrank	Root	domain	Bacteria	phylum	Proteobacteria	class	Epsilonproteobacteria	order	Campylobacterales	family	Helicobacteraceae	genus	Sulfurovum
14	S001418542	0.954	gamma proteobacterium ectosymbiont of Rimicaris exoculata; TAG_368_gam105; FM203382	rootrank	Root	domain	Bacteria	phylum	Proteobacteria	class	Gammaproteobacteria	order	Gammaproteobacteria_incertae_sedis	genus	Cocleimonas
14	S001575193	0.95	gamma proteobacterium ectosymbiont of Rimicaris exoculata; LOG_272/6-9_D1; FN393024	rootrank	Root	domain	Bacteria	phylum	Proteobacteria	class	Gammaproteobacteria	order	Gammaproteobacteria_incertae_sedis	genus	Cocleimonas
14	S002355747	0.96	gamma proteobacterium ectosymbiont of Rimicaris exoculata; Gamma S2-12; FN658699	rootrank	Root	domain	Bacteria	phylum	Proteobacteria	class	Gammaproteobacteria	order	Gammaproteobacteria_incertae_sedis	genus	Cocleimonas
15	S000861380	0.913	uncultured prokaryote; IIB112; AM268719	rootrank	Root	domain	Bacteria	phylum	Proteobacteria	class	Epsilonproteobacteria	order	Campylobacterales	family	Helicobacteraceae	genus	Sulfurovum
15	S001418551	0.901	epsilon proteobacterium ectosymbiont of Rimicaris exoculata; LOG_283/7-2_C6; FM203391	rootrank	Root	domain	Bacteria	phylum	Proteobacteria	class	Epsilonproteobacteria	order	Campylobacterales	family	Helicobacteraceae	genus	Sulfurovum
15	S002281824	0.913	uncultured epsilon proteobacterium; aH7; FN562844	rootrank	Root	domain	Bacteria	phylum	Proteobacteria	class	Epsilonproteobacteria	order	Campylobacterales	family	Helicobacteraceae	genus	Sulfurovum
16	S000622036	0.86	uncultured bacterium; LC1228B-46; DQ270625	rootrank	Root	domain	Bacteria	phylum	Proteobacteria	class	Gammaproteobacteria	order	Gammaproteobacteria_incertae_sedis	genus	Cocleimonas
16	S001078414	0.858	uncultured bacterium; 4132B17; EU555124	rootrank	Root	domain	Bacteria	phylum	Proteobacteria	class	Gammaproteobacteria	order	Gammaproteobacteria_incertae_sedis	genus	Cocleimonas
16	S001337723	0.88	uncultured bacterium; SGXT601; FJ792012	rootrank	Root	domain	Bacteria	phylum	Proteobacteria	class	Gammaproteobacteria	order	Gammaproteobacteria_incertae_sedis	genus	Cocleimonas
17	S000359059	0.926	uncultured bacterium; SF_C7-A9; AY531565	rootrank	Root	domain	Bacteria	phylum	Proteobacteria	class	Gammaproteobacteria	order	Gammaproteobacteria_incertae_sedis	genus	Cocleimonas
17	S001331571	0.934	gamma proteobacterium ectosymbiont of Rimicaris exoculata; R_c16_gam2; FM203374	rootrank	Root	domain	Bacteria	phylum	Proteobacteria	class	Gammaproteobacteria	order	Gammaproteobacteria_incertae_sedis	genus	Cocleimonas
17	S001331572	0.948	gamma proteobacterium ectosymbiont of Rimicaris exoculata; R_c16_gam3; FM203375	rootrank	Root	domain	Bacteria	phylum	Proteobacteria	class	Gammaproteobacteria	order	Gammaproteobacteria_incertae_sedis	genus	Cocleimonas
18	S000861380	0.895	uncultured prokaryote; IIB112; AM268719	rootrank	Root	domain	Bacteria	phylum	Proteobacteria	class	Epsilonproteobacteria	order	Campylobacterales	family	Helicobacteraceae	genus	Sulfurovum
18	S001418556	0.888	epsilon proteobacterium ectosymbiont of Rimicaris exoculata; LOG_272/6-9_P2C1; FM203396	rootrank	Root	domain	Bacteria	phylum	Proteobacteria	class	Epsilonproteobacteria	order	Campylobacterales	family	Helicobacteraceae	genus	Sulfurovum
18	S002281824	0.886	uncultured epsilon proteobacterium; aH7; FN562844	rootrank	Root	domain	Bacteria	phylum	Proteobacteria	class	Epsilonproteobacteria	order	Campylobacterales	family	Helicobacteraceae	genus	Sulfurovum
19	S000147911	0.897	uncultured epsilon proteobacterium; 11; AJ515717	rootrank	Root	domain	Bacteria	phylum	Proteobacteria	class	Epsilonproteobacteria	order	Campylobacterales	family	Helicobacteraceae	genus	Sulfurovum
19	S000148634	0.897	uncultured epsilon proteobacterium; 15; AJ515716	rootrank	Root	domain	Bacteria	phylum	Proteobacteria	class	Epsilonproteobacteria	order	Campylobacterales	family	Helicobacteraceae	genus	Sulfurovum
19	S000403078	0.948	uncultured epsilon proteobacterium; AT-co12; AY225618	rootrank	Root	domain	Bacteria	phylum	Proteobacteria	class	Epsilonproteobacteria	order	Campylobacterales	family	Helicobacteraceae	genus	Sulfurovum
20	S000861380	0.914	uncultured prokaryote; IIB112; AM268719	rootrank	Root	domain	Bacteria	phylum	Proteobacteria	class	Epsilonproteobacteria	order	Campylobacterales	family	Helicobacteraceae	genus	Sulfurovum
20	S001418551	0.899	epsilon proteobacterium ectosymbiont of Rimicaris exoculata; LOG_283/7-2_C6; FM203391	rootrank	Root	domain	Bacteria	phylum	Proteobacteria	class	Epsilonproteobacteria	order	Campylobacterales	family	Helicobacteraceae	genus	Sulfurovum
20	S002281824	0.914	uncultured epsilon proteobacterium; aH7; FN562844	rootrank	Root	domain	Bacteria	phylum	Proteobacteria	class	Epsilonproteobacteria	order	Campylobacterales	family	Helicobacteraceae	genus	Sulfurovum
21	S000359066	0.912	uncultured bacterium; SF_C23-G9; AY531572	rootrank	Root	domain	Bacteria	phylum	Proteobacteria	class	Epsilonproteobacteria	order	Campylobacterales	family	Helicobacteraceae	genus	Sulfurovum
21	S000359098	0.899	uncultured bacterium; SF_C23-F6; AY531604	rootrank	Root	domain	Bacteria	phylum	Proteobacteria	class	Epsilonproteobacteria	order	Campylobacterales	family	Helicobacteraceae	genus	Sulfurovum
21	S002355745	0.941	epsilon proteobacterium ectosymbiont of Rimicaris exoculata; Epsilon S2-7; FN658697	rootrank	Root	domain	Bacteria	phylum	Proteobacteria	class	Epsilonproteobacteria	order	Campylobacterales	family	Helicobacteraceae	genus	Sulfurovum
22	S000359059	0.936	uncultured bacterium; SF_C7-A9; AY531565	rootrank	Root	domain	Bacteria	phylum	Proteobacteria	class	Gammaproteobacteria	order	Gammaproteobacteria_incertae_sedis	genus	Cocleimonas
22	S001331571	0.944	gamma proteobacterium ectosymbiont of Rimicaris exoculata; R_c16_gam2; FM203374	rootrank	Root	domain	Bacteria	phylum	Proteobacteria	class	Gammaproteobacteria	order	Gammaproteobacteria_incertae_sedis	genus	Cocleimonas
22	S001331572	0.958	gamma proteobacterium ectosymbiont of Rimicaris exoculata; R_c16_gam3; FM203375	rootrank	Root	domain	Bacteria	phylum	Proteobacteria	class	Gammaproteobacteria	order	Gammaproteobacteria_incertae_sedis	genus	Cocleimonas
23	S000989626	0.609	uncultured Bacteroidetes bacterium; HCM3MC80_8A_FL; EU374049	rootrank	Root	domain	Bacteria	phylum	Bacteroidetes	class	Sphingobacteriia	order	Sphingobacteriales	family	Saprospiraceae		unclassified_"Saprospiraceae"
23	S001249678	0.974	uncultured bacterium; IHE0_1174; AB476238	rootrank	Root	domain	Bacteria	phylum	Bacteroidetes	class	Sphingobacteriia	order	Sphingobacteriales	family	Saprospiraceae		unclassified_"Saprospiraceae"
23	S003149202	0.605	uncultured organism; SBYW_2679; JN484508	rootrank	Root	domain	Bacteria	phylum	Bacteroidetes	class	Sphingobacteriia	order	Sphingobacteriales	family	Saprospiraceae		unclassified_"Saprospiraceae"
24	S000357678	0.839	uncultured bacterium; SF_C4-E6; AY327875	rootrank	Root	domain	Bacteria	phylum	Bacteroidetes	class	Sphingobacteriia	order	Sphingobacteriales	family	Saprospiraceae		unclassified_"Saprospiraceae"
24	S000359060	0.839	uncultured bacterium; SF_C7-A6; AY531566	rootrank	Root	domain	Bacteria	phylum	Bacteroidetes	class	Sphingobacteriia	order	Sphingobacteriales	family	Saprospiraceae		unclassified_"Saprospiraceae"
24	S001249626	0.885	uncultured bacterium; HAT0_689; AB476186	rootrank	Root	domain	Bacteria	phylum	Bacteroidetes	class	Sphingobacteriia	order	Sphingobacteriales	family	Saprospiraceae		unclassified_"Saprospiraceae"
25	S002281835	0.92	uncultured epsilon proteobacterium; bC9; FN562855	rootrank	Root	domain	Bacteria	phylum	Proteobacteria	class	Epsilonproteobacteria	order	Campylobacterales	family	Helicobacteraceae	genus	Sulfurovum
25	S002355744	0.964	epsilon proteobacterium ectosymbiont of Rimicaris exoculata; Epsilon S2-16; FN658696	rootrank	Root	domain	Bacteria	phylum	Proteobacteria	class	Epsilonproteobacteria	order	Campylobacterales	family	Helicobacteraceae	genus	Sulfurovum
25	S004435620	0.914	bacterium episymbiont of Kiwa sp.; ARB_FAF7118E; KF439002	rootrank	Root	domain	Bacteria	phylum	Proteobacteria	class	Epsilonproteobacteria	order	Campylobacterales	family	Helicobacteraceae	genus	Sulfurovum
26	S000987863	0.894	uncultured gamma proteobacterium; D2; EU265784	rootrank	Root	domain	Bacteria	phylum	Proteobacteria	class	Gammaproteobacteria	order	Gammaproteobacteria_incertae_sedis	genus	Cocleimonas
26	S003083782	0.896	uncultured gamma proteobacterium; Contig_0352__x3; JN256006	rootrank	Root	domain	Bacteria	phylum	Proteobacteria	class	Gammaproteobacteria	order	Gammaproteobacteria_incertae_sedis	genus	Cocleimonas
26	S004247356	0.878	uncultured bacterium; UN0_63; AB981861	rootrank	Root	domain	Bacteria	phylum	Proteobacteria	class	Gammaproteobacteria	order	Gammaproteobacteria_incertae_sedis	genus	Cocleimonas
27	S000357678	0.71	uncultured bacterium; SF_C4-E6; AY327875	rootrank	Root	domain	Bacteria	phylum	Bacteroidetes	class	Sphingobacteriia	order	Sphingobacteriales	family	Saprospiraceae		unclassified_"Saprospiraceae"
27	S000359060	0.708	uncultured bacterium; SF_C7-A6; AY531566	rootrank	Root	domain	Bacteria	phylum	Bacteroidetes	class	Sphingobacteriia	order	Sphingobacteriales	family	Saprospiraceae		unclassified_"Saprospiraceae"
27	S004585444	0.796	uncultured bacterium; Tica293Exp_4A; KT257784	rootrank	Root	domain	Bacteria	phylum	Bacteroidetes	class	Sphingobacteriia	order	Sphingobacteriales	family	Saprospiraceae		unclassified_"Saprospiraceae"
28	S000359072	0.922	uncultured bacterium; SF_C23-G11; AY531578	rootrank	Root	domain	Bacteria	phylum	Proteobacteria	class	Epsilonproteobacteria	order	Campylobacterales	family	Helicobacteraceae	genus	Sulfurovum
28	S000359079	0.941	uncultured bacterium; SF_C23-C11_shell; AY531585	rootrank	Root	domain	Bacteria	phylum	Proteobacteria	class	Epsilonproteobacteria	order	Campylobacterales	family	Helicobacteraceae	genus	Sulfurovum
28	S002355745	0.924	epsilon proteobacterium ectosymbiont of Rimicaris exoculata; Epsilon S2-7; FN658697	rootrank	Root	domain	Bacteria	phylum	Proteobacteria	class	Epsilonproteobacteria	order	Campylobacterales	family	Helicobacteraceae	genus	Sulfurovum
29	S001418546	0.96	gamma proteobacterium ectosymbiont of Rimicaris exoculata; LOG_283/7-2_D9; FM203386	rootrank	Root	domain	Bacteria	phylum	Proteobacteria	class	Gammaproteobacteria	order	Gammaproteobacteria_incertae_sedis	genus	Cocleimonas
29	S001575193	0.964	gamma proteobacterium ectosymbiont of Rimicaris exoculata; LOG_272/6-9_D1; FN393024	rootrank	Root	domain	Bacteria	phylum	Proteobacteria	class	Gammaproteobacteria	order	Gammaproteobacteria_incertae_sedis	genus	Cocleimonas
29	S002355747	0.966	gamma proteobacterium ectosymbiont of Rimicaris exoculata; Gamma S2-12; FN658699	rootrank	Root	domain	Bacteria	phylum	Proteobacteria	class	Gammaproteobacteria	order	Gammaproteobacteria_incertae_sedis	genus	Cocleimonas
30	S000403084	0.901	uncultured epsilon proteobacterium; AT-pp27; AY225624	rootrank	Root	domain	Bacteria	phylum	Proteobacteria	class	Epsilonproteobacteria	order	Campylobacterales	family	Helicobacteraceae	genus	Sulfurovum
30	S000861380	0.889	uncultured prokaryote; IIB112; AM268719	rootrank	Root	domain	Bacteria	phylum	Proteobacteria	class	Epsilonproteobacteria	order	Campylobacterales	family	Helicobacteraceae	genus	Sulfurovum
30	S001418556	0.883	epsilon proteobacterium ectosymbiont of Rimicaris exoculata; LOG_272/6-9_P2C1; FM203396	rootrank	Root	domain	Bacteria	phylum	Proteobacteria	class	Epsilonproteobacteria	order	Campylobacterales	family	Helicobacteraceae	genus	Sulfurovum
31	S000660747	1	uncultured organism; ctg_CGOF269; DQ395675	rootrank	Root	domain	Bacteria	phylum	Proteobacteria	class	Alphaproteobacteria	order	Rhodobacterales	family	Rhodobacteraceae	genus	Sulfitobacter
31	S000750372	1	Sulfitobacter sp. S-8; DQ978989	rootrank	Root	domain	Bacteria	phylum	Proteobacteria	class	Alphaproteobacteria	order	Rhodobacterales	family	Rhodobacteraceae	genus	Sulfitobacter
31	S000893418	1	Sulfitobacter sp. BSi20563; EF673288	rootrank	Root	domain	Bacteria	phylum	Proteobacteria	class	Alphaproteobacteria	order	Rhodobacterales	family	Rhodobacteraceae	genus	Sulfitobacter
32	S001418546	0.946	gamma proteobacterium ectosymbiont of Rimicaris exoculata; LOG_283/7-2_D9; FM203386	rootrank	Root	domain	Bacteria	phylum	Proteobacteria	class	Gammaproteobacteria	order	Gammaproteobacteria_incertae_sedis	genus	Cocleimonas
32	S001575193	0.95	gamma proteobacterium ectosymbiont of Rimicaris exoculata; LOG_272/6-9_D1; FN393024	rootrank	Root	domain	Bacteria	phylum	Proteobacteria	class	Gammaproteobacteria	order	Gammaproteobacteria_incertae_sedis	genus	Cocleimonas
32	S002355747	0.952	gamma proteobacterium ectosymbiont of Rimicaris exoculata; Gamma S2-12; FN658699	rootrank	Root	domain	Bacteria	phylum	Proteobacteria	class	Gammaproteobacteria	order	Gammaproteobacteria_incertae_sedis	genus	Cocleimonas
33	S000622026	0.848	uncultured bacterium; LC1133B-23; DQ270615	rootrank	Root	domain	Bacteria	phylum	Proteobacteria	class	Gammaproteobacteria	order	Gammaproteobacteria_incertae_sedis	genus	Cocleimonas
33	S001078414	0.848	uncultured bacterium; 4132B17; EU555124	rootrank	Root	domain	Bacteria	phylum	Proteobacteria	class	Gammaproteobacteria	order	Gammaproteobacteria_incertae_sedis	genus	Cocleimonas
33	S001337723	0.866	uncultured bacterium; SGXT601; FJ792012	rootrank	Root	domain	Bacteria	phylum	Proteobacteria	class	Gammaproteobacteria	order	Gammaproteobacteria_incertae_sedis	genus	Cocleimonas
34	S000443890	0.829	uncultured bacterium; 2; AY766314	rootrank	Root	domain	Bacteria	phylum	Proteobacteria	class	Epsilonproteobacteria	order	Campylobacterales	family	Helicobacteraceae	genus	Sulfurovum
34	S001022512	0.838	uncultured bacterium; ROB1; EF644841	rootrank	Root	domain	Bacteria	phylum	Proteobacteria	class	Epsilonproteobacteria	order	Campylobacterales	family	Helicobacteraceae	genus	Sulfurovum
34	S000443891	0.897	uncultured bacterium; 3; AY766315	rootrank	Root	domain	Bacteria	phylum	Proteobacteria	class	Epsilonproteobacteria		unclassified_Epsilonproteobacteria
35	S000455484	0.746	uncultured Flavobacteriaceae bacterium; F1C22T; AY794064	rootrank	Root	domain	Bacteria	phylum	Bacteroidetes	class	Flavobacteriia	order	Flavobacteriales	family	Flavobacteriaceae	genus	Polaribacter
35	S002893692	0.724	uncultured Polaribacter sp.; K2S75; JN177600	rootrank	Root	domain	Bacteria	phylum	Bacteroidetes	class	Flavobacteriia	order	Flavobacteriales	family	Flavobacteriaceae	genus	Polaribacter
35	S004585399	0.867	uncultured bacterium; Basalt_1D; KT257739	rootrank	Root	domain	Bacteria	phylum	Bacteroidetes	class	Flavobacteriia	order	Flavobacteriales	family	Flavobacteriaceae		unclassified_Flavobacteriaceae
36	S001740813	1	uncultured Bacteroidetes bacterium; DBS1h1; GQ984357	rootrank	Root	domain	Bacteria	phylum	Bacteroidetes	class	Flavobacteriia	order	Flavobacteriales	family	Flavobacteriaceae	genus	Croceibacter
36	S002289371	1	Croceibacter atlanticus (T); HTCC2559; CP002046	rootrank	Root	domain	Bacteria	phylum	Bacteroidetes	class	Flavobacteriia	order	Flavobacteriales	family	Flavobacteriaceae	genus	Croceibacter
36	S002289474	1	Croceibacter atlanticus (T); HTCC2559; CP002046	rootrank	Root	domain	Bacteria	phylum	Bacteroidetes	class	Flavobacteriia	order	Flavobacteriales	family	Flavobacteriaceae	genus	Croceibacter
37	S000493475	0.986	uncultured Bacteroidetes bacterium; 131816; AY922241	rootrank	Root	domain	Bacteria	phylum	Bacteroidetes	class	Flavobacteriia	order	Flavobacteriales	family	Flavobacteriaceae	genus	Olleya
37	S000493481	1	uncultured Bacteroidetes bacterium; 131848; AY922247	rootrank	Root	domain	Bacteria	phylum	Bacteroidetes	class	Flavobacteriia	order	Flavobacteriales	family	Flavobacteriaceae	genus	Olleya
37	S002035459	0.933	Olleya sp. 204Z-30; GU584182	rootrank	Root	domain	Bacteria	phylum	Bacteroidetes	class	Flavobacteriia	order	Flavobacteriales	family	Flavobacteriaceae	genus	Olleya
38	S000359079	0.882	uncultured bacterium; SF_C23-C11_shell; AY531585	rootrank	Root	domain	Bacteria	phylum	Proteobacteria	class	Epsilonproteobacteria	order	Campylobacterales	family	Helicobacteraceae	genus	Sulfurovum
38	S000403084	0.869	uncultured epsilon proteobacterium; AT-pp27; AY225624	rootrank	Root	domain	Bacteria	phylum	Proteobacteria	class	Epsilonproteobacteria	order	Campylobacterales	family	Helicobacteraceae	genus	Sulfurovum
38	S000861380	0.876	uncultured prokaryote; IIB112; AM268719	rootrank	Root	domain	Bacteria	phylum	Proteobacteria	class	Epsilonproteobacteria	order	Campylobacterales	family	Helicobacteraceae	genus	Sulfurovum
39	S004435607	0.869	bacterium episymbiont of Kiwa sp.; ARB_19AA493D; KF438989	rootrank	Root	domain	Bacteria	phylum	Proteobacteria	class	Gammaproteobacteria	order	Gammaproteobacteria_incertae_sedis	genus	Cocleimonas
39	S004435609	0.85	bacterium episymbiont of Kiwa sp.; ARB_8114AC2A; KF438991	rootrank	Root	domain	Bacteria	phylum	Proteobacteria	class	Gammaproteobacteria	order	Gammaproteobacteria_incertae_sedis	genus	Cocleimonas
39	S004435629	0.848	bacterium episymbiont of Kiwa sp.; ARB_F41C2656; KF439011	rootrank	Root	domain	Bacteria	phylum	Proteobacteria	class	Gammaproteobacteria	order	Gammaproteobacteria_incertae_sedis	genus	Cocleimonas
40	S000359059	0.942	uncultured bacterium; SF_C7-A9; AY531565	rootrank	Root	domain	Bacteria	phylum	Proteobacteria	class	Gammaproteobacteria	order	Gammaproteobacteria_incertae_sedis	genus	Cocleimonas
40	S001331571	0.972	gamma proteobacterium ectosymbiont of Rimicaris exoculata; R_c16_gam2; FM203374	rootrank	Root	domain	Bacteria	phylum	Proteobacteria	class	Gammaproteobacteria	order	Gammaproteobacteria_incertae_sedis	genus	Cocleimonas
40	S001418538	0.96	gamma proteobacterium ectosymbiont of Rimicaris exoculata; R_c20_gam1; FM203378	rootrank	Root	domain	Bacteria	phylum	Proteobacteria	class	Gammaproteobacteria	order	Gammaproteobacteria_incertae_sedis	genus	Cocleimonas
41	S000861380	0.891	uncultured prokaryote; IIB112; AM268719	rootrank	Root	domain	Bacteria	phylum	Proteobacteria	class	Epsilonproteobacteria	order	Campylobacterales	family	Helicobacteraceae	genus	Sulfurovum
41	S001418556	0.885	epsilon proteobacterium ectosymbiont of Rimicaris exoculata; LOG_272/6-9_P2C1; FM203396	rootrank	Root	domain	Bacteria	phylum	Proteobacteria	class	Epsilonproteobacteria	order	Campylobacterales	family	Helicobacteraceae	genus	Sulfurovum
41	S002281824	0.885	uncultured epsilon proteobacterium; aH7; FN562844	rootrank	Root	domain	Bacteria	phylum	Proteobacteria	class	Epsilonproteobacteria	order	Campylobacterales	family	Helicobacteraceae	genus	Sulfurovum
42	S001318082	0.964	uncultured bacterium; Ba9; FJ640825	rootrank	Root	domain	Bacteria	phylum	Proteobacteria	class	Gammaproteobacteria	order	Gammaproteobacteria_incertae_sedis	genus	Cocleimonas
42	S002764026	0.95	uncultured bacterium; P1-b13.seq; FR852958	rootrank	Root	domain	Bacteria	phylum	Proteobacteria	class	Gammaproteobacteria	order	Gammaproteobacteria_incertae_sedis	genus	Cocleimonas
42	S003237845	0.95	uncultured prokaryote; P1-b13; JQ072907	rootrank	Root	domain	Bacteria	phylum	Proteobacteria	class	Gammaproteobacteria	order	Gammaproteobacteria_incertae_sedis	genus	Cocleimonas
43	S001318082	0.932	uncultured bacterium; Ba9; FJ640825	rootrank	Root	domain	Bacteria	phylum	Proteobacteria	class	Gammaproteobacteria	order	Gammaproteobacteria_incertae_sedis	genus	Cocleimonas
43	S002764026	0.956	uncultured bacterium; P1-b13.seq; FR852958	rootrank	Root	domain	Bacteria	phylum	Proteobacteria	class	Gammaproteobacteria	order	Gammaproteobacteria_incertae_sedis	genus	Cocleimonas
43	S003237845	0.956	uncultured prokaryote; P1-b13; JQ072907	rootrank	Root	domain	Bacteria	phylum	Proteobacteria	class	Gammaproteobacteria	order	Gammaproteobacteria_incertae_sedis	genus	Cocleimonas
44	S004435664	0.872	bacterium episymbiont of Kiwa sp.; ARB_238D64A2; KF439046	rootrank	Root	domain	Bacteria	phylum	Bacteroidetes	class	Flavobacteriia	order	Flavobacteriales	family	Flavobacteriaceae	genus	Lutimonas
44	S004585433	0.818	uncultured bacterium; Basalt_3B; KT257773	rootrank	Root	domain	Bacteria	phylum	Bacteroidetes	class	Flavobacteriia	order	Flavobacteriales	family	Flavobacteriaceae	genus	Lutimonas
44	S004585421	0.894	uncultured bacterium; Tica76Exp_2A; KT257761	rootrank	Root	domain	Bacteria	phylum	Bacteroidetes	class	Flavobacteriia	order	Flavobacteriales	family	Flavobacteriaceae		unclassified_Flavobacteriaceae
45	S002475000	0.912	uncultured gamma proteobacterium; 25D6; GQ274087	rootrank	Root	domain	Bacteria	phylum	Proteobacteria	class	Gammaproteobacteria	order	Gammaproteobacteria_incertae_sedis	genus	Cocleimonas
45	S003539893	0.914	uncultured gamma proteobacterium; FII-OX040; JQ579689	rootrank	Root	domain	Bacteria	phylum	Proteobacteria	class	Gammaproteobacteria	order	Gammaproteobacteria_incertae_sedis	genus	Cocleimonas
45	S003539942	0.882	uncultured gamma proteobacterium; FII-OX089; JQ579738	rootrank	Root	domain	Bacteria	phylum	Proteobacteria	class	Gammaproteobacteria	order	Gammaproteobacteria_incertae_sedis	genus	Cocleimonas
46	S000134676	0.922	uncultured alpha proteobacterium; MBAE27; AJ567586	rootrank	Root	domain	Bacteria	phylum	Proteobacteria	class	Alphaproteobacteria	order	Rhodobacterales	family	Rhodobacteraceae		unclassified_Rhodobacteraceae
46	S003707392	0.92	uncultured bacterium; TuiMs_LR3F6; KC682637	rootrank	Root	domain	Bacteria	phylum	Proteobacteria	class	Alphaproteobacteria	order	Rhodobacterales	family	Rhodobacteraceae		unclassified_Rhodobacteraceae
46	S004034648	0.915	uncultured bacterium; DolOr_36034; JQ215291	rootrank	Root	domain	Bacteria	phylum	Proteobacteria	class	Alphaproteobacteria	order	Rhodobacterales	family	Rhodobacteraceae		unclassified_Rhodobacteraceae
47	S001318082	0.936	uncultured bacterium; Ba9; FJ640825	rootrank	Root	domain	Bacteria	phylum	Proteobacteria	class	Gammaproteobacteria	order	Gammaproteobacteria_incertae_sedis	genus	Cocleimonas
47	S002764026	0.964	uncultured bacterium; P1-b13.seq; FR852958	rootrank	Root	domain	Bacteria	phylum	Proteobacteria	class	Gammaproteobacteria	order	Gammaproteobacteria_incertae_sedis	genus	Cocleimonas
47	S003237845	0.964	uncultured prokaryote; P1-b13; JQ072907	rootrank	Root	domain	Bacteria	phylum	Proteobacteria	class	Gammaproteobacteria	order	Gammaproteobacteria_incertae_sedis	genus	Cocleimonas
48	S001418546	0.96	gamma proteobacterium ectosymbiont of Rimicaris exoculata; LOG_283/7-2_D9; FM203386	rootrank	Root	domain	Bacteria	phylum	Proteobacteria	class	Gammaproteobacteria	order	Gammaproteobacteria_incertae_sedis	genus	Cocleimonas
48	S001575193	0.964	gamma proteobacterium ectosymbiont of Rimicaris exoculata; LOG_272/6-9_D1; FN393024	rootrank	Root	domain	Bacteria	phylum	Proteobacteria	class	Gammaproteobacteria	order	Gammaproteobacteria_incertae_sedis	genus	Cocleimonas
48	S002355747	0.966	gamma proteobacterium ectosymbiont of Rimicaris exoculata; Gamma S2-12; FN658699	rootrank	Root	domain	Bacteria	phylum	Proteobacteria	class	Gammaproteobacteria	order	Gammaproteobacteria_incertae_sedis	genus	Cocleimonas
49	S003426659	0.886	uncultured bacterium; BJGMM-1s-157; JQ800726	rootrank	Root	domain	Bacteria	phylum	Proteobacteria	class	Alphaproteobacteria	order	Rhodobacterales	family	Rhodobacteraceae		unclassified_Rhodobacteraceae
49	S003704877	0.826	uncultured bacterium; YC1_B91; KC631560	rootrank	Root	domain	Bacteria	phylum	Proteobacteria	class	Alphaproteobacteria	order	Rhodobacterales	family	Rhodobacteraceae		unclassified_Rhodobacteraceae
49	S003944942	0.846	uncultured bacterium; NBB28; JX226832	rootrank	Root	domain	Bacteria	phylum	Proteobacteria	class	Alphaproteobacteria	order	Rhodobacterales	family	Rhodobacteraceae		unclassified_Rhodobacteraceae
50	S001418546	0.946	gamma proteobacterium ectosymbiont of Rimicaris exoculata; LOG_283/7-2_D9; FM203386	rootrank	Root	domain	Bacteria	phylum	Proteobacteria	class	Gammaproteobacteria	order	Gammaproteobacteria_incertae_sedis	genus	Cocleimonas
50	S001575193	0.95	gamma proteobacterium ectosymbiont of Rimicaris exoculata; LOG_272/6-9_D1; FN393024	rootrank	Root	domain	Bacteria	phylum	Proteobacteria	class	Gammaproteobacteria	order	Gammaproteobacteria_incertae_sedis	genus	Cocleimonas
50	S002355747	0.98	gamma proteobacterium ectosymbiont of Rimicaris exoculata; Gamma S2-12; FN658699	rootrank	Root	domain	Bacteria	phylum	Proteobacteria	class	Gammaproteobacteria	order	Gammaproteobacteria_incertae_sedis	genus	Cocleimonas
51	S001021218	0.987	uncultured alpha proteobacterium; 243; EF188430	rootrank	Root	domain	Bacteria	phylum	Proteobacteria	class	Alphaproteobacteria	order	Rhizobiales	family	Methylobacteriaceae	genus	Methylobacterium
51	S001093815	0.969	Methylobacterium sp. F1; AM910530	rootrank	Root	domain	Bacteria	phylum	Proteobacteria	class	Alphaproteobacteria	order	Rhizobiales	family	Methylobacteriaceae	genus	Methylobacterium
51	S003286736	0.971	Methylobacterium marchantiae; 66g; AB698716	rootrank	Root	domain	Bacteria	phylum	Proteobacteria	class	Alphaproteobacteria	order	Rhizobiales	family	Methylobacteriaceae	genus	Methylobacterium
52	S000403070	0.915	uncultured epsilon proteobacterium; AT-pp13; AY225610	rootrank	Root	domain	Bacteria	phylum	Proteobacteria	class	Epsilonproteobacteria	order	Campylobacterales	family	Campylobacteraceae	genus	Arcobacter
52	S003251631	0.842	uncultured bacterium; 3M23_033; JQ287069	rootrank	Root	domain	Bacteria	phylum	Proteobacteria	class	Epsilonproteobacteria	order	Campylobacterales	family	Campylobacteraceae	genus	Arcobacter
52	S004435631	0.894	bacterium episymbiont of Kiwa sp.; ARB_2269F39B; KF439013	rootrank	Root	domain	Bacteria	phylum	Proteobacteria	class	Epsilonproteobacteria	order	Campylobacterales	family	Campylobacteraceae	genus	Arcobacter
53	S004435664	0.874	bacterium episymbiont of Kiwa sp.; ARB_238D64A2; KF439046	rootrank	Root	domain	Bacteria	phylum	Bacteroidetes	class	Flavobacteriia	order	Flavobacteriales	family	Flavobacteriaceae	genus	Lutimonas
53	S004585433	0.824	uncultured bacterium; Basalt_3B; KT257773	rootrank	Root	domain	Bacteria	phylum	Bacteroidetes	class	Flavobacteriia	order	Flavobacteriales	family	Flavobacteriaceae	genus	Lutimonas
53	S004585421	0.884	uncultured bacterium; Tica76Exp_2A; KT257761	rootrank	Root	domain	Bacteria	phylum	Bacteroidetes	class	Flavobacteriia	order	Flavobacteriales	family	Flavobacteriaceae		unclassified_Flavobacteriaceae
54	S004053729	0.972	Polaribacter sp. TC5; KF472182	rootrank	Root	domain	Bacteria	phylum	Bacteroidetes	class	Flavobacteriia	order	Flavobacteriales	family	Flavobacteriaceae	genus	Polaribacter
54	S004115432	0.988	uncultured bacterium; SEM2G121; KJ094204	rootrank	Root	domain	Bacteria	phylum	Bacteroidetes	class	Flavobacteriia	order	Flavobacteriales	family	Flavobacteriaceae	genus	Polaribacter
54	S004483777	0.976	Polaribacter sp. RZW3-2; KR080701	rootrank	Root	domain	Bacteria	phylum	Bacteroidetes	class	Flavobacteriia	order	Flavobacteriales	family	Flavobacteriaceae	genus	Polaribacter
55	S000403084	0.916	uncultured epsilon proteobacterium; AT-pp27; AY225624	rootrank	Root	domain	Bacteria	phylum	Proteobacteria	class	Epsilonproteobacteria	order	Campylobacterales	family	Helicobacteraceae	genus	Sulfurovum
55	S002988092	0.897	uncultured epsilon proteobacterium; RT07B_BI_44; EF441902	rootrank	Root	domain	Bacteria	phylum	Proteobacteria	class	Epsilonproteobacteria	order	Campylobacterales	family	Helicobacteraceae	genus	Sulfurovum
55	S004585479	0.897	uncultured bacterium; Tica13Con_1F_7H; KT257819	rootrank	Root	domain	Bacteria	phylum	Proteobacteria	class	Epsilonproteobacteria	order	Campylobacterales	family	Helicobacteraceae	genus	Sulfurovum
56	S000493475	0.974	uncultured Bacteroidetes bacterium; 131816; AY922241	rootrank	Root	domain	Bacteria	phylum	Bacteroidetes	class	Flavobacteriia	order	Flavobacteriales	family	Flavobacteriaceae	genus	Olleya
56	S000493481	0.988	uncultured Bacteroidetes bacterium; 131848; AY922247	rootrank	Root	domain	Bacteria	phylum	Bacteroidetes	class	Flavobacteriia	order	Flavobacteriales	family	Flavobacteriaceae	genus	Olleya
56	S002035459	0.935	Olleya sp. 204Z-30; GU584182	rootrank	Root	domain	Bacteria	phylum	Bacteroidetes	class	Flavobacteriia	order	Flavobacteriales	family	Flavobacteriaceae	genus	Olleya
57	S000861380	0.89	uncultured prokaryote; IIB112; AM268719	rootrank	Root	domain	Bacteria	phylum	Proteobacteria	class	Epsilonproteobacteria	order	Campylobacterales	family	Helicobacteraceae	genus	Sulfurovum
57	S001418551	0.879	epsilon proteobacterium ectosymbiont of Rimicaris exoculata; LOG_283/7-2_C6; FM203391	rootrank	Root	domain	Bacteria	phylum	Proteobacteria	class	Epsilonproteobacteria	order	Campylobacterales	family	Helicobacteraceae	genus	Sulfurovum
57	S002281824	0.89	uncultured epsilon proteobacterium; aH7; FN562844	rootrank	Root	domain	Bacteria	phylum	Proteobacteria	class	Epsilonproteobacteria	order	Campylobacterales	family	Helicobacteraceae	genus	Sulfurovum
58	S000403084	0.857	uncultured epsilon proteobacterium; AT-pp27; AY225624	rootrank	Root	domain	Bacteria	phylum	Proteobacteria	class	Epsilonproteobacteria	order	Campylobacterales	family	Helicobacteraceae	genus	Sulfurovum
58	S000861380	0.853	uncultured prokaryote; IIB112; AM268719	rootrank	Root	domain	Bacteria	phylum	Proteobacteria	class	Epsilonproteobacteria	order	Campylobacterales	family	Helicobacteraceae	genus	Sulfurovum
58	S002988092	0.849	uncultured epsilon proteobacterium; RT07B_BI_44; EF441902	rootrank	Root	domain	Bacteria	phylum	Proteobacteria	class	Epsilonproteobacteria	order	Campylobacterales	family	Helicobacteraceae	genus	Sulfurovum
59	S002947645	0.711	Rhodobacteraceae bacterium enrichment culture clone TBNAP74; JN166983	rootrank	Root	domain	Bacteria	phylum	Proteobacteria	class	Alphaproteobacteria	order	Rhodobacterales	family	Rhodobacteraceae	genus	Salipiger
59	S004051594	0.724	Salipiger nanhaiensis (T); ZH114; KF356414	rootrank	Root	domain	Bacteria	phylum	Proteobacteria	class	Alphaproteobacteria	order	Rhodobacterales	family	Rhodobacteraceae	genus	Salipiger
59	S001320402	0.765	uncultured alpha proteobacterium; plankton_B10; FJ664794	rootrank	Root	domain	Bacteria	phylum	Proteobacteria	class	Alphaproteobacteria	order	Rhodobacterales	family	Rhodobacteraceae		unclassified_Rhodobacteraceae
60	S001740813	0.986	uncultured Bacteroidetes bacterium; DBS1h1; GQ984357	rootrank	Root	domain	Bacteria	phylum	Bacteroidetes	class	Flavobacteriia	order	Flavobacteriales	family	Flavobacteriaceae	genus	Croceibacter
60	S002289371	0.99	Croceibacter atlanticus (T); HTCC2559; CP002046	rootrank	Root	domain	Bacteria	phylum	Bacteroidetes	class	Flavobacteriia	order	Flavobacteriales	family	Flavobacteriaceae	genus	Croceibacter
60	S002289474	0.99	Croceibacter atlanticus (T); HTCC2559; CP002046	rootrank	Root	domain	Bacteria	phylum	Bacteroidetes	class	Flavobacteriia	order	Flavobacteriales	family	Flavobacteriaceae	genus	Croceibacter
61	S001242562	0.917	Flexibacter sp. S4475; FJ457298	rootrank	Root	domain	Bacteria	phylum	Bacteroidetes	class	Flavobacteriia	order	Flavobacteriales	family	Flavobacteriaceae	genus	Tenacibaculum
61	S002033879	0.899	Tenacibaculum sp. VCSA14A; GQ996383	rootrank	Root	domain	Bacteria	phylum	Bacteroidetes	class	Flavobacteriia	order	Flavobacteriales	family	Flavobacteriaceae	genus	Tenacibaculum
61	S002436136	0.899	uncultured bacterium; SBS-RV-076; HQ326335	rootrank	Root	domain	Bacteria	phylum	Bacteroidetes	class	Flavobacteriia	order	Flavobacteriales	family	Flavobacteriaceae	genus	Tenacibaculum
62	S004120470	0.986	uncultured bacterium; L4-B13; KJ549035	rootrank	Root	domain	Bacteria	phylum	Bacteroidetes	class	Flavobacteriia	order	Flavobacteriales	family	Flavobacteriaceae	genus	Nonlabens
62	S004120502	0.986	uncultured bacterium; L4-B55; KJ549067	rootrank	Root	domain	Bacteria	phylum	Bacteroidetes	class	Flavobacteriia	order	Flavobacteriales	family	Flavobacteriaceae	genus	Nonlabens
62	S004120508	0.986	uncultured bacterium; L4-B61; KJ549073	rootrank	Root	domain	Bacteria	phylum	Bacteroidetes	class	Flavobacteriia	order	Flavobacteriales	family	Flavobacteriaceae	genus	Nonlabens
63	S001872111	0.912	Cocleimonas flava (T); KMM 3898; AB495251	rootrank	Root	domain	Bacteria	phylum	Proteobacteria	class	Gammaproteobacteria	order	Gammaproteobacteria_incertae_sedis	genus	Cocleimonas
63	S002475000	0.958	uncultured gamma proteobacterium; 25D6; GQ274087	rootrank	Root	domain	Bacteria	phylum	Proteobacteria	class	Gammaproteobacteria	order	Gammaproteobacteria_incertae_sedis	genus	Cocleimonas
63	S003539893	0.928	uncultured gamma proteobacterium; FII-OX040; JQ579689	rootrank	Root	domain	Bacteria	phylum	Proteobacteria	class	Gammaproteobacteria	order	Gammaproteobacteria_incertae_sedis	genus	Cocleimonas
64	S002281835	0.92	uncultured epsilon proteobacterium; bC9; FN562855	rootrank	Root	domain	Bacteria	phylum	Proteobacteria	class	Epsilonproteobacteria	order	Campylobacterales	family	Helicobacteraceae	genus	Sulfurovum
64	S002355744	0.964	epsilon proteobacterium ectosymbiont of Rimicaris exoculata; Epsilon S2-16; FN658696	rootrank	Root	domain	Bacteria	phylum	Proteobacteria	class	Epsilonproteobacteria	order	Campylobacterales	family	Helicobacteraceae	genus	Sulfurovum
64	S004435620	0.916	bacterium episymbiont of Kiwa sp.; ARB_FAF7118E; KF439002	rootrank	Root	domain	Bacteria	phylum	Proteobacteria	class	Epsilonproteobacteria	order	Campylobacterales	family	Helicobacteraceae	genus	Sulfurovum
65	S004061748	0.986	Lacinutrix sp. 5H-3-7-4; CP002825	rootrank	Root	domain	Bacteria	phylum	Bacteroidetes	class	Flavobacteriia	order	Flavobacteriales	family	Flavobacteriaceae	genus	Lacinutrix
65	S004061749	1	Lacinutrix sp. 5H-3-7-4; CP002825	rootrank	Root	domain	Bacteria	phylum	Bacteroidetes	class	Flavobacteriia	order	Flavobacteriales	family	Flavobacteriaceae	genus	Lacinutrix
65	S004115440	0.936	uncultured bacterium; SEM1H051; KJ094212	rootrank	Root	domain	Bacteria	phylum	Bacteroidetes	class	Flavobacteriia	order	Flavobacteriales	family	Flavobacteriaceae	genus	Lacinutrix
66	S000541944	0.965	uncultured epsilon proteobacterium; NKB8; AB013260	rootrank	Root	domain	Bacteria	phylum	Proteobacteria	class	Epsilonproteobacteria	order	Campylobacterales	family	Helicobacteraceae	genus	Sulfurovum
66	S000560703	0.95	uncultured epsilon proteobacterium; BD2-1; AB015531	rootrank	Root	domain	Bacteria	phylum	Proteobacteria	class	Epsilonproteobacteria	order	Campylobacterales	family	Helicobacteraceae	genus	Sulfurovum
66	S003230700	0.95	uncultured bacterium; RESET_18B11; JN874110	rootrank	Root	domain	Bacteria	phylum	Proteobacteria	class	Epsilonproteobacteria	order	Campylobacterales	family	Helicobacteraceae	genus	Sulfurovum
67	S000660885	0.989	uncultured organism; ctg_CGOF302; DQ395813	rootrank	Root	domain	Bacteria	phylum	Proteobacteria	class	Alphaproteobacteria	order	Rhodobacterales	family	Rhodobacteraceae	genus	Sulfitobacter
67	S000661379	1	uncultured organism; ctg_NISA248; DQ396309	rootrank	Root	domain	Bacteria	phylum	Proteobacteria	class	Alphaproteobacteria	order	Rhodobacterales	family	Rhodobacteraceae	genus	Sulfitobacter
67	S004120504	1	uncultured bacterium; L4-B57; KJ549069	rootrank	Root	domain	Bacteria	phylum	Proteobacteria	class	Alphaproteobacteria	order	Rhodobacterales	family	Rhodobacteraceae	genus	Sulfitobacter
68	S000455484	0.658	uncultured Flavobacteriaceae bacterium; F1C22T; AY794064	rootrank	Root	domain	Bacteria	phylum	Bacteroidetes	class	Flavobacteriia	order	Flavobacteriales	family	Flavobacteriaceae	genus	Polaribacter
68	S002194826	0.63	uncultured bacterium; MethaneSIP2-10-22; GU584379	rootrank	Root	domain	Bacteria	phylum	Bacteroidetes	class	Flavobacteriia	order	Flavobacteriales	family	Flavobacteriaceae	genus	Pseudofulvibacter
68	S001223939	0.614	uncultured bacterium; 089L88; FJ416110	rootrank	Root	domain	Bacteria	phylum	Bacteroidetes	class	Flavobacteriia	order	Flavobacteriales	family	Flavobacteriaceae		unclassified_Flavobacteriaceae
69	S000147911	0.947	uncultured epsilon proteobacterium; 11; AJ515717	rootrank	Root	domain	Bacteria	phylum	Proteobacteria	class	Epsilonproteobacteria	order	Campylobacterales	family	Helicobacteraceae	genus	Sulfurovum
69	S000148634	0.947	uncultured epsilon proteobacterium; 15; AJ515716	rootrank	Root	domain	Bacteria	phylum	Proteobacteria	class	Epsilonproteobacteria	order	Campylobacterales	family	Helicobacteraceae	genus	Sulfurovum
69	S002355744	0.947	epsilon proteobacterium ectosymbiont of Rimicaris exoculata; Epsilon S2-16; FN658696	rootrank	Root	domain	Bacteria	phylum	Proteobacteria	class	Epsilonproteobacteria	order	Campylobacterales	family	Helicobacteraceae	genus	Sulfurovum
70	S000861380	0.882	uncultured prokaryote; IIB112; AM268719	rootrank	Root	domain	Bacteria	phylum	Proteobacteria	class	Epsilonproteobacteria	order	Campylobacterales	family	Helicobacteraceae	genus	Sulfurovum
70	S001418556	0.876	epsilon proteobacterium ectosymbiont of Rimicaris exoculata; LOG_272/6-9_P2C1; FM203396	rootrank	Root	domain	Bacteria	phylum	Proteobacteria	class	Epsilonproteobacteria	order	Campylobacterales	family	Helicobacteraceae	genus	Sulfurovum
70	S002281824	0.876	uncultured epsilon proteobacterium; aH7; FN562844	rootrank	Root	domain	Bacteria	phylum	Proteobacteria	class	Epsilonproteobacteria	order	Campylobacterales	family	Helicobacteraceae	genus	Sulfurovum
71	S000359079	0.877	uncultured bacterium; SF_C23-C11_shell; AY531585	rootrank	Root	domain	Bacteria	phylum	Proteobacteria	class	Epsilonproteobacteria	order	Campylobacterales	family	Helicobacteraceae	genus	Sulfurovum
71	S000403083	0.897	uncultured epsilon proteobacterium; AT-cs15; AY225623	rootrank	Root	domain	Bacteria	phylum	Proteobacteria	class	Epsilonproteobacteria	order	Campylobacterales	family	Helicobacteraceae	genus	Sulfurovum
71	S000403084	0.937	uncultured epsilon proteobacterium; AT-pp27; AY225624	rootrank	Root	domain	Bacteria	phylum	Proteobacteria	class	Epsilonproteobacteria	order	Campylobacterales	family	Helicobacteraceae	genus	Sulfurovum
72	S000622036	0.852	uncultured bacterium; LC1228B-46; DQ270625	rootrank	Root	domain	Bacteria	phylum	Proteobacteria	class	Gammaproteobacteria	order	Gammaproteobacteria_incertae_sedis	genus	Cocleimonas
72	S001337723	0.868	uncultured bacterium; SGXT601; FJ792012	rootrank	Root	domain	Bacteria	phylum	Proteobacteria	class	Gammaproteobacteria	order	Gammaproteobacteria_incertae_sedis	genus	Cocleimonas
72	S004435636	0.85	bacterium episymbiont of Kiwa sp.; ARB_B1C4EAF5; KF439018	rootrank	Root	domain	Bacteria	phylum	Proteobacteria	class	Gammaproteobacteria	order	Gammaproteobacteria_incertae_sedis	genus	Cocleimonas
73	S000622054	0.918	uncultured bacterium; LC1133B-58; DQ270643	rootrank	Root	domain	Bacteria	phylum	Proteobacteria	class	Epsilonproteobacteria	order	Campylobacterales	family	Helicobacteraceae	genus	Sulfurovum
73	S000622064	0.912	uncultured bacterium; LC1228B-116; DQ270653	rootrank	Root	domain	Bacteria	phylum	Proteobacteria	class	Epsilonproteobacteria	order	Campylobacterales	family	Helicobacteraceae	genus	Sulfurovum
73	S000622066	0.897	uncultured bacterium; LC1404B-6; DQ270655	rootrank	Root	domain	Bacteria	phylum	Proteobacteria	class	Epsilonproteobacteria	order	Campylobacterales	family	Helicobacteraceae	genus	Sulfurovum
74	S000861380	0.909	uncultured prokaryote; IIB112; AM268719	rootrank	Root	domain	Bacteria	phylum	Proteobacteria	class	Epsilonproteobacteria	order	Campylobacterales	family	Helicobacteraceae	genus	Sulfurovum
74	S001418556	0.903	epsilon proteobacterium ectosymbiont of Rimicaris exoculata; LOG_272/6-9_P2C1; FM203396	rootrank	Root	domain	Bacteria	phylum	Proteobacteria	class	Epsilonproteobacteria	order	Campylobacterales	family	Helicobacteraceae	genus	Sulfurovum
74	S002281824	0.901	uncultured epsilon proteobacterium; aH7; FN562844	rootrank	Root	domain	Bacteria	phylum	Proteobacteria	class	Epsilonproteobacteria	order	Campylobacterales	family	Helicobacteraceae	genus	Sulfurovum
75	S000861380	0.914	uncultured prokaryote; IIB112; AM268719	rootrank	Root	domain	Bacteria	phylum	Proteobacteria	class	Epsilonproteobacteria	order	Campylobacterales	family	Helicobacteraceae	genus	Sulfurovum
75	S001418551	0.899	epsilon proteobacterium ectosymbiont of Rimicaris exoculata; LOG_283/7-2_C6; FM203391	rootrank	Root	domain	Bacteria	phylum	Proteobacteria	class	Epsilonproteobacteria	order	Campylobacterales	family	Helicobacteraceae	genus	Sulfurovum
75	S002281824	0.914	uncultured epsilon proteobacterium; aH7; FN562844	rootrank	Root	domain	Bacteria	phylum	Proteobacteria	class	Epsilonproteobacteria	order	Campylobacterales	family	Helicobacteraceae	genus	Sulfurovum
76	S001590664	0.868	uncultured bacterium; Nit2A0620_8; EU265935	rootrank	Root	domain	Bacteria		unclassified_Bacteria
76	S002341990	0.883	uncultured bacterium; AMSMV-0-B91; HQ588387	rootrank	Root	domain	Bacteria		unclassified_Bacteria
76	S003251989	0.886	uncultured bacterium; 3M34_002; JQ287427	rootrank	Root	domain	Bacteria		unclassified_Bacteria
77	S000346069	0.879	uncultured proteobacterium; C1_B006; 0-1 cm layer of core C; AF420359	rootrank	Root	domain	Bacteria	phylum	Proteobacteria	class	Epsilonproteobacteria	order	Campylobacterales	family	Helicobacteraceae	genus	Sulfurovum
77	S001238332	0.873	uncultured bacterium; V2tb18; FM165253	rootrank	Root	domain	Bacteria	phylum	Proteobacteria	class	Epsilonproteobacteria	order	Campylobacterales	family	Helicobacteraceae	genus	Sulfurovum
77	S003230795	0.877	uncultured bacterium; RESET_28E10; JN874205	rootrank	Root	domain	Bacteria	phylum	Proteobacteria	class	Epsilonproteobacteria	order	Campylobacterales	family	Helicobacteraceae	genus	Sulfurovum
78	S002281835	0.945	uncultured epsilon proteobacterium; bC9; FN562855	rootrank	Root	domain	Bacteria	phylum	Proteobacteria	class	Epsilonproteobacteria	order	Campylobacterales	family	Helicobacteraceae	genus	Sulfurovum
78	S002355744	0.937	epsilon proteobacterium ectosymbiont of Rimicaris exoculata; Epsilon S2-16; FN658696	rootrank	Root	domain	Bacteria	phylum	Proteobacteria	class	Epsilonproteobacteria	order	Campylobacterales	family	Helicobacteraceae	genus	Sulfurovum
78	S003230824	0.935	uncultured bacterium; RESET_28B06; JN874234	rootrank	Root	domain	Bacteria	phylum	Proteobacteria	class	Epsilonproteobacteria	order	Campylobacterales	family	Helicobacteraceae	genus	Sulfurovum
79	S001418538	0.96	gamma proteobacterium ectosymbiont of Rimicaris exoculata; R_c20_gam1; FM203378	rootrank	Root	domain	Bacteria	phylum	Proteobacteria	class	Gammaproteobacteria	order	Gammaproteobacteria_incertae_sedis	genus	Cocleimonas
79	S001575193	0.964	gamma proteobacterium ectosymbiont of Rimicaris exoculata; LOG_272/6-9_D1; FN393024	rootrank	Root	domain	Bacteria	phylum	Proteobacteria	class	Gammaproteobacteria	order	Gammaproteobacteria_incertae_sedis	genus	Cocleimonas
79	S002355747	0.966	gamma proteobacterium ectosymbiont of Rimicaris exoculata; Gamma S2-12; FN658699	rootrank	Root	domain	Bacteria	phylum	Proteobacteria	class	Gammaproteobacteria	order	Gammaproteobacteria_incertae_sedis	genus	Cocleimonas
80	S000124784	0.942	uncultured proteobacterium; B01R006; AY197378	rootrank	Root	domain	Bacteria	phylum	Proteobacteria	class	Epsilonproteobacteria	order	Campylobacterales	family	Helicobacteraceae	genus	Sulfurovum
80	S003887880	0.967	uncultured bacterium; HR43; JQ036283	rootrank	Root	domain	Bacteria	phylum	Proteobacteria	class	Epsilonproteobacteria	order	Campylobacterales	family	Helicobacteraceae	genus	Sulfurovum
80	S004515483	0.967	uncultured bacterium; B_S2518_43_FL; KM356224	rootrank	Root	domain	Bacteria	phylum	Proteobacteria	class	Epsilonproteobacteria	order	Campylobacterales	family	Helicobacteraceae	genus	Sulfurovum
81	S000493474	0.986	uncultured Bacteroidetes bacterium; 131803; AY922240	rootrank	Root	domain	Bacteria	phylum	Bacteroidetes	class	Flavobacteriia	order	Flavobacteriales	family	Flavobacteriaceae	genus	Mesonia
81	S001155452	0.972	Salegentibacter sp. p68; EU864263	rootrank	Root	domain	Bacteria	phylum	Bacteroidetes	class	Flavobacteriia	order	Flavobacteriales	family	Flavobacteriaceae	genus	Mesonia
81	S002347751	0.986	uncultured bacterium; F9P261000_S_I05; HQ674157	rootrank	Root	domain	Bacteria	phylum	Bacteroidetes	class	Flavobacteriia	order	Flavobacteriales	family	Flavobacteriaceae	genus	Mesonia
82	S000359059	0.894	uncultured bacterium; SF_C7-A9; AY531565	rootrank	Root	domain	Bacteria	phylum	Proteobacteria	class	Gammaproteobacteria	order	Gammaproteobacteria_incertae_sedis	genus	Cocleimonas
82	S001078410	0.896	uncultured bacterium; 4132B13; EU555120	rootrank	Root	domain	Bacteria	phylum	Proteobacteria	class	Gammaproteobacteria	order	Gammaproteobacteria_incertae_sedis	genus	Cocleimonas
82	S003083782	0.908	uncultured gamma proteobacterium; Contig_0352__x3; JN256006	rootrank	Root	domain	Bacteria	phylum	Proteobacteria	class	Gammaproteobacteria	order	Gammaproteobacteria_incertae_sedis	genus	Cocleimonas
83	S000989626	0.622	uncultured Bacteroidetes bacterium; HCM3MC80_8A_FL; EU374049	rootrank	Root	domain	Bacteria	phylum	Bacteroidetes	class	Sphingobacteriia	order	Sphingobacteriales	family	Saprospiraceae		unclassified_"Saprospiraceae"
83	S001175934	0.596	uncultured bacterium; CA; FJ155020	rootrank	Root	domain	Bacteria	phylum	Bacteroidetes	class	Sphingobacteriia	order	Sphingobacteriales	family	Saprospiraceae		unclassified_"Saprospiraceae"
83	S001249678	0.831	uncultured bacterium; IHE0_1174; AB476238	rootrank	Root	domain	Bacteria	phylum	Bacteroidetes	class	Sphingobacteriia	order	Sphingobacteriales	family	Saprospiraceae		unclassified_"Saprospiraceae"
84	S002867435	0.919	uncultured bacterium; NEP2-18; JF769510	rootrank	Root	domain	Bacteria	phylum	Proteobacteria	class	Alphaproteobacteria	order	Rhodobacterales	family	Rhodobacteraceae	genus	Sulfitobacter
84	S002867440	0.919	uncultured bacterium; NEP2-27; JF769515	rootrank	Root	domain	Bacteria	phylum	Proteobacteria	class	Alphaproteobacteria	order	Rhodobacterales	family	Rhodobacteraceae	genus	Sulfitobacter
84	S004213376	0.899	Sulfitobacter pseudonitzschiae (T); H3; KF006321	rootrank	Root	domain	Bacteria	phylum	Proteobacteria	class	Alphaproteobacteria	order	Rhodobacterales	family	Rhodobacteraceae	genus	Sulfitobacter
85	S000125350	0.928	uncultured proteobacterium; B01R002; AY197375	rootrank	Root	domain	Bacteria	phylum	Proteobacteria	class	Epsilonproteobacteria	order	Campylobacterales	family	Helicobacteraceae	genus	Sulfurovum
85	S002281835	0.947	uncultured epsilon proteobacterium; bC9; FN562855	rootrank	Root	domain	Bacteria	phylum	Proteobacteria	class	Epsilonproteobacteria	order	Campylobacterales	family	Helicobacteraceae	genus	Sulfurovum
85	S002355744	0.939	epsilon proteobacterium ectosymbiont of Rimicaris exoculata; Epsilon S2-16; FN658696	rootrank	Root	domain	Bacteria	phylum	Proteobacteria	class	Epsilonproteobacteria	order	Campylobacterales	family	Helicobacteraceae	genus	Sulfurovum
86	S003276959	0.728	Rhodovulum sp. KU27F3; AB636145	rootrank	Root	domain	Bacteria	phylum	Proteobacteria	class	Alphaproteobacteria	order	Rhodobacterales	family	Rhodobacteraceae	genus	Rhodovulum
86	S004051594	0.739	Salipiger nanhaiensis (T); ZH114; KF356414	rootrank	Root	domain	Bacteria	phylum	Proteobacteria	class	Alphaproteobacteria	order	Rhodobacterales	family	Rhodobacteraceae	genus	Salipiger
86	S001320402	0.786	uncultured alpha proteobacterium; plankton_B10; FJ664794	rootrank	Root	domain	Bacteria	phylum	Proteobacteria	class	Alphaproteobacteria	order	Rhodobacterales	family	Rhodobacteraceae		unclassified_Rhodobacteraceae
87	S001418536	0.956	epsilon proteobacterium ectosymbiont of Rimicaris exoculata; R_c20_eps1; FM203376	rootrank	Root	domain	Bacteria	phylum	Proteobacteria	class	Epsilonproteobacteria	order	Campylobacterales	family	Helicobacteraceae	genus	Sulfurovum
87	S001418537	0.956	epsilon proteobacterium ectosymbiont of Rimicaris exoculata; R_c20_eps3; FM203377	rootrank	Root	domain	Bacteria	phylum	Proteobacteria	class	Epsilonproteobacteria	order	Campylobacterales	family	Helicobacteraceae	genus	Sulfurovum
87	S001418566	0.956	epsilon proteobacterium ectosymbiont of Rimicaris exoculata; R_c18_eps2; FM203406	rootrank	Root	domain	Bacteria	phylum	Proteobacteria	class	Epsilonproteobacteria	order	Campylobacterales	family	Helicobacteraceae	genus	Sulfurovum
88	S000359066	0.903	uncultured bacterium; SF_C23-G9; AY531572	rootrank	Root	domain	Bacteria	phylum	Proteobacteria	class	Epsilonproteobacteria	order	Campylobacterales	family	Helicobacteraceae	genus	Sulfurovum
88	S000359098	0.897	uncultured bacterium; SF_C23-F6; AY531604	rootrank	Root	domain	Bacteria	phylum	Proteobacteria	class	Epsilonproteobacteria	order	Campylobacterales	family	Helicobacteraceae	genus	Sulfurovum
88	S002355745	0.909	epsilon proteobacterium ectosymbiont of Rimicaris exoculata; Epsilon S2-7; FN658697	rootrank	Root	domain	Bacteria	phylum	Proteobacteria	class	Epsilonproteobacteria	order	Campylobacterales	family	Helicobacteraceae	genus	Sulfurovum
89	S001418546	0.95	gamma proteobacterium ectosymbiont of Rimicaris exoculata; LOG_283/7-2_D9; FM203386	rootrank	Root	domain	Bacteria	phylum	Proteobacteria	class	Gammaproteobacteria	order	Gammaproteobacteria_incertae_sedis	genus	Cocleimonas
89	S001575193	0.954	gamma proteobacterium ectosymbiont of Rimicaris exoculata; LOG_272/6-9_D1; FN393024	rootrank	Root	domain	Bacteria	phylum	Proteobacteria	class	Gammaproteobacteria	order	Gammaproteobacteria_incertae_sedis	genus	Cocleimonas
89	S002355747	0.956	gamma proteobacterium ectosymbiont of Rimicaris exoculata; Gamma S2-12; FN658699	rootrank	Root	domain	Bacteria	phylum	Proteobacteria	class	Gammaproteobacteria	order	Gammaproteobacteria_incertae_sedis	genus	Cocleimonas
90	S001133036	1	uncultured bacterium; 1C226552; EU799002	rootrank	Root	domain	Bacteria	phylum	Proteobacteria	class	Alphaproteobacteria	order	Rhodobacterales	family	Rhodobacteraceae	genus	Planktomarina
90	S001133043	1	uncultured bacterium; 1C226560; EU799009	rootrank	Root	domain	Bacteria	phylum	Proteobacteria	class	Alphaproteobacteria	order	Rhodobacterales	family	Rhodobacteraceae	genus	Planktomarina
90	S001133063	1	uncultured bacterium; 1C226582; EU799029	rootrank	Root	domain	Bacteria	phylum	Proteobacteria	class	Alphaproteobacteria	order	Rhodobacterales	family	Rhodobacteraceae	genus	Planktomarina
91	S000455484	0.668	uncultured Flavobacteriaceae bacterium; F1C22T; AY794064	rootrank	Root	domain	Bacteria	phylum	Bacteroidetes	class	Flavobacteriia	order	Flavobacteriales	family	Flavobacteriaceae	genus	Polaribacter
91	S002194826	0.64	uncultured bacterium; MethaneSIP2-10-22; GU584379	rootrank	Root	domain	Bacteria	phylum	Bacteroidetes	class	Flavobacteriia	order	Flavobacteriales	family	Flavobacteriaceae	genus	Pseudofulvibacter
91	S000608759	0.634	Flavobacterium sp. 3034; AM110988	rootrank	Root	domain	Bacteria	phylum	Bacteroidetes	class	Flavobacteriia	order	Flavobacteriales	family	Flavobacteriaceae		unclassified_Flavobacteriaceae
92	S001078414	0.891	uncultured bacterium; 4132B17; EU555124	rootrank	Root	domain	Bacteria	phylum	Proteobacteria	class	Gammaproteobacteria	order	Gammaproteobacteria_incertae_sedis	genus	Cocleimonas
92	S001337723	0.859	uncultured bacterium; SGXT601; FJ792012	rootrank	Root	domain	Bacteria	phylum	Proteobacteria	class	Gammaproteobacteria	order	Gammaproteobacteria_incertae_sedis	genus	Cocleimonas
92	S004019559	0.859	uncultured bacterium; SeaWat_55658; JQ200201	rootrank	Root	domain	Bacteria	phylum	Proteobacteria	class	Gammaproteobacteria	order	Gammaproteobacteria_incertae_sedis	genus	Cocleimonas
93	S002281836	0.866	uncultured epsilon proteobacterium; bE9; FN562856	rootrank	Root	domain	Bacteria	phylum	Proteobacteria	class	Epsilonproteobacteria	order	Campylobacterales	family	Helicobacteraceae	genus	Sulfurovum
93	S002281837	0.881	uncultured epsilon proteobacterium; bH8; FN562857	rootrank	Root	domain	Bacteria	phylum	Proteobacteria	class	Epsilonproteobacteria	order	Campylobacterales	family	Helicobacteraceae	genus	Sulfurovum
93	S002424213	0.866	uncultured bacterium; SW-Apr-70; HQ203945	rootrank	Root	domain	Bacteria	phylum	Proteobacteria	class	Epsilonproteobacteria	order	Campylobacterales	family	Helicobacteraceae	genus	Sulfurovum
94	S000594454	0.963	Hellea balneolensis (T); 26III/A02/215; AY576758	rootrank	Root	domain	Bacteria	phylum	Proteobacteria	class	Alphaproteobacteria	order	Caulobacterales	family	Hyphomonadaceae	genus	Hellea
94	S001249693	0.941	uncultured bacterium; IHE3_063; AB476253	rootrank	Root	domain	Bacteria	phylum	Proteobacteria	class	Alphaproteobacteria	order	Caulobacterales	family	Hyphomonadaceae	genus	Hellea
94	S001340899	0.917	uncultured marine bacterium; BM1-F-46; FJ826144	rootrank	Root	domain	Bacteria	phylum	Proteobacteria	class	Alphaproteobacteria	order	Caulobacterales	family	Hyphomonadaceae	genus	Hellea
95	S001418536	0.985	epsilon proteobacterium ectosymbiont of Rimicaris exoculata; R_c20_eps1; FM203376	rootrank	Root	domain	Bacteria	phylum	Proteobacteria	class	Epsilonproteobacteria	order	Campylobacterales	family	Helicobacteraceae	genus	Sulfurovum
95	S001418537	0.985	epsilon proteobacterium ectosymbiont of Rimicaris exoculata; R_c20_eps3; FM203377	rootrank	Root	domain	Bacteria	phylum	Proteobacteria	class	Epsilonproteobacteria	order	Campylobacterales	family	Helicobacteraceae	genus	Sulfurovum
95	S001418566	0.985	epsilon proteobacterium ectosymbiont of Rimicaris exoculata; R_c18_eps2; FM203406	rootrank	Root	domain	Bacteria	phylum	Proteobacteria	class	Epsilonproteobacteria	order	Campylobacterales	family	Helicobacteraceae	genus	Sulfurovum
96	S003251872	0.85	uncultured bacterium; 7M24_033; JQ287310	rootrank	Root	domain	Bacteria	phylum	Proteobacteria	class	Gammaproteobacteria	order	Arenicellales	family	Arenicellaceae	genus	Arenicella
96	S003251898	0.85	uncultured bacterium; 7M24_063; JQ287336	rootrank	Root	domain	Bacteria	phylum	Proteobacteria	class	Gammaproteobacteria	order	Arenicellales	family	Arenicellaceae	genus	Arenicella
96	S003442066	0.848	uncultured bacterium; HglApr126; JX015613	rootrank	Root	domain	Bacteria	phylum	Proteobacteria	class	Gammaproteobacteria	order	Arenicellales	family	Arenicellaceae	genus	Arenicella
97	S000654313	0.851	uncultured bacterium; AL-5; AB232535	rootrank	Root	domain	Bacteria	phylum	Bacteroidetes	class	Flavobacteriia	order	Flavobacteriales	family	Flavobacteriaceae		unclassified_Flavobacteriaceae
97	S002281887	0.849	uncultured bacterium; bH5; FN562908	rootrank	Root	domain	Bacteria	phylum	Bacteroidetes	class	Flavobacteriia	order	Flavobacteriales	family	Flavobacteriaceae		unclassified_Flavobacteriaceae
97	S004405664	0.803	uncultured bacterium; Free_800_Bac029; KM820435	rootrank	Root	domain	Bacteria	phylum	Bacteroidetes	class	Flavobacteriia	order	Flavobacteriales	family	Flavobacteriaceae		unclassified_Flavobacteriaceae
98	S004462377	0.9	Octadecabacter temperatus; SB1; CP012160	rootrank	Root	domain	Bacteria	phylum	Proteobacteria	class	Alphaproteobacteria	order	Rhodobacterales	family	Rhodobacteraceae	genus	Octadecabacter
98	S002474956	0.938	uncultured alpha proteobacterium; 54eD3; GQ274042	rootrank	Root	domain	Bacteria	phylum	Proteobacteria	class	Alphaproteobacteria	order	Rhodobacterales	family	Rhodobacteraceae		unclassified_Rhodobacteraceae
98	S004014454	0.92	uncultured bacterium; SeaWat_15381; JQ195094	rootrank	Root	domain	Bacteria	phylum	Proteobacteria	class	Alphaproteobacteria	order	Rhodobacterales	family	Rhodobacteraceae		unclassified_Rhodobacteraceae
99	S001102592	0.974	uncultured Leucothrix sp.; B16; EU107481	rootrank	Root	domain	Bacteria	phylum	Proteobacteria	class	Gammaproteobacteria	order	Gammaproteobacteria_incertae_sedis	genus	Cocleimonas
99	S001318082	0.972	uncultured bacterium; Ba9; FJ640825	rootrank	Root	domain	Bacteria	phylum	Proteobacteria	class	Gammaproteobacteria	order	Gammaproteobacteria_incertae_sedis	genus	Cocleimonas
99	S004247318	0.972	uncultured gamma proteobacterium; setae2_26; AB981823	rootrank	Root	domain	Bacteria	phylum	Proteobacteria	class	Gammaproteobacteria	order	Gammaproteobacteria_incertae_sedis	genus	Cocleimonas
